1 **Title: Aurora kinase A is essential for meiosis in mouse oocytes**

2 **Running title: AURKA and female meiosis**

3 **Authors:** Cecilia S. Blengini<sup>1,2\*</sup>, Patricia Ibrahimian<sup>1\*</sup>, Michaela Vaskovicova<sup>3</sup>,  
4 David Drutovic<sup>3</sup>, Petr Solc<sup>3</sup>, Karen Schindler<sup>1,2†</sup>

5 **Affiliations:**

6 1- Department of Genetics; Rutgers, The State University of New Jersey

7 2- Human Genetics Institute of New Jersey

8 3- Institute of Animal Physiology and Genetics of the Czech Academy of Sciences,

9 Libechov, Czech Republic

10 † Corresponding Author:

11 145 Bevier Rd

12 Piscataway, NJ 08854 USA

13 Ph- 1-848-445-2563

14 Email- [ks804@hgij.rutgers.edu](mailto:ks804@hgij.rutgers.edu)

15

16 \* These authors contributed equally to this work

17

18 **Key words:** Aurora kinase, AURKA, meiosis, oocyte, microtubule organizing center,

19 fertility

20

21

22

23

24

25

26

27

28 **Abstract**

29 The Aurora protein kinases are well-established regulators of spindle building and  
30 chromosome segregation in mitotic and meiotic cells. In mouse oocytes, there is  
31 significant Aurora kinase A (AURKA) compensatory abilities when the other Aurora  
32 kinase homologs are deleted. Whether the other homologs, AURKB or AURKC can  
33 compensate for loss of AURKA is not known. Using a conditional mouse oocyte  
34 knockout model, we demonstrate that this compensation is not reciprocal because  
35 female oocyte-specific knockout mice are sterile and their oocytes fail to complete  
36 meiosis I. In determining the AURKA-specific functions, we demonstrate that its first  
37 meiotic requirement is to activate Polo-like kinase 1 at microtubule organizing centers  
38 (MTOCs; meiotic spindle poles). This activation induces fragmentation of the MTOCs, a  
39 step essential for building a bipolar spindle. The next step that requires AURKA is  
40 building the liquid-like spindle domain that involves TACC3. Finally, we find that AURKA  
41 is also required for anaphase I onset to trigger cohesin cleavage in an APC/C  
42 independent manner. We conclude that AURKA has multiple functions essential to  
43 completing MI that are distinct from AURKB and AURKC.

44

45 **Author Summary**

46 Female gametes, oocytes, are uniquely prone to chromosome segregation errors in  
47 meiosis I that are associated with early miscarriages. The Aurora protein kinases are  
48 essential to control chromosome segregation in all cell types. During mitosis, Aurora  
49 kinase A (AURKA) regulates the building of the spindle, the machinery responsible for  
50 pulling chromosomes apart. Here, we use a genetic approach to demonstrate that  
51 AURKA is essential for meiosis I in mouse oocytes. AURKA is required at multiple steps  
52 in meiosis I, first to trigger fragmentation of protein structures that make up the two ends  
53 of the meiotic spindle, later to regulate building of a specialized phase-separated  
54 spindle domain, and finally to trigger efficient cleavage of cohesin, the molecular glue  
55 that holds chromosomes together until anaphase onset. These findings are the first  
56 demonstration of distinct Aurora kinase function that cannot be compensated for by the  
57 other two homologs. Therefore, this mouse model is excellent tool for pinpointing  
58 specific Aurora kinase functions and identifying AURKA target proteins critical for  
59 chromosome segregation in meiosis I.

60

61

62

63

## 64 **Introduction**

65 Haploid gametes, which are required for sexual reproduction, are generated  
66 through meiosis; a cell division that undergoes two successive rounds of chromosome  
67 segregation without an intervening round of DNA replication. First, homologous  
68 chromosomes are separated during meiosis I (MI), followed by sister chromatid  
69 separation in meiosis II (MII). Errors in MI give rise to aneuploid gametes that, if  
70 fertilized, lead to congenital birth defects or embryo development failure [1-3]. Critical to  
71 accurate chromosome segregation is the formation of a bipolar spindle apparatus which  
72 captures chromosomes and pulls them apart. Therefore, defects in spindle building  
73 could cause chromosome mis-segregation and aneuploidy.

74 In somatic cells, spindles are built from microtubules that nucleate from  
75 centrosomes. Centrosomes are cellular structures that form the ends, or poles, of the  
76 spindle and are composed of centrioles surrounded by organized layers of pericentriolar  
77 material (PCM). However, in mammalian oocytes this process is strikingly different  
78 because centrioles were lost during oocyte development [4]. In mouse oocytes, spindle  
79 formation depends on multiple microtubule organizing centers (MTOC) that lack  
80 centrioles but retain PCM that nucleate microtubules [5-9]. During spindle formation,  
81 MTOCs undergo a series of highly regulated, morphological changes. First, MTOCs  
82 decondense and fragment into smaller MTOCs. Next, these small MTOCs are sorted so  
83 that after an intermediate multi-polar ball-like formation, they finally cluster into the two  
84 poles of the spindle [9, 10]. Perturbation of any of these steps dramatically affects the  
85 spindle structure and the interaction between microtubules and chromosomes, which  
86 ultimately can alter chromosome segregation. One result of this perturbation is that

87 oocytes fail to complete meiosis because they activate the spindle assembly checkpoint  
88 (SAC) that monitors attachment of microtubules to kinetochores and delays anaphase  
89 onset until kinetochores are appropriately attached [11].

90         The Aurora kinases (AURK) are a family of serine/threonine protein kinases  
91 involved in chromosome segregation, in mitosis and in meiosis [12-14]. This protein  
92 family has three members: AURKA, AURKB and AURKC. Most somatic cells express  
93 only AURKA and AURKB, but oocytes express all three isoforms. In somatic cells,  
94 AURKA localizes to centrosomes and is involved in centrosome maturation and  
95 separation [15-17] and microtubule nucleation [18, 19]. However, in meiosis, two  
96 AURKs are needed to build a normal bipolar spindle: AURKA and AURKC [20]. AURKA  
97 localizes to MTOCs [21-23], and may contribute to spindle formation through  
98 mechanisms different than those used in mitosis: regulating MTOC numbers [21, 22,  
99 24], the distribution of MTOCs into two poles [10, 22] and maintaining spindle pole  
100 structure [25, 26]. Furthermore, AURKA activity is required to assemble a liquid-like  
101 spindle domain (LISD) composed of several regulatory factors. The LISD is proposed to  
102 allow rapid, and localized, protein concentration changes around microtubules during  
103 spindle formation [8]. Depletion or inhibition of AURKA in mouse oocytes produces  
104 short, disorganized spindles, characterized by over-clustered MTOCs and loss of the  
105 LISD [8, 21, 23, 26]. Consistent with these spindle abnormalities, these depleted or  
106 inhibited oocytes fail to complete meiosis and arrest in metaphase I [21, 22]. AURKC  
107 also localizes to MTOCs and contributes to MTOC clustering into two spindle poles.  
108 Prevention of AURKC from localizing to MTOCs in mouse oocytes causes frequent  
109 multipolar spindle formation and increased rates of aneuploid egg production [20].

110 In oocytes, the AURKs exhibit complex genetic interactions and compensatory  
111 abilities. For example, AURKB is the catalytic component of the chromosome  
112 passenger complex (CPC) in mitosis. But, in oocytes, AURKC outcompetes AURKB  
113 and takes over this CPC role [27, 28]. Furthermore, oocytes can complete meiosis in  
114 the absence of both AURKB and AURKC because AURKA can function in the CPC; this  
115 is specific to oocytes because this compensation does not occur in HeLa cells or in  
116 spermatocytes [29, 30]. However, although AURKA can compensate, it is not complete  
117 because a subset of oocytes arrest in metaphase I with short spindles. These short  
118 spindles arise because AURKC is required outcompete AURKA from CPC-binding to  
119 keep AURKA at MTOCs and ensure appropriate spindle length [29]. Because AURKA  
120 and AURKC compete for CPC binding and because a second population of AURKC  
121 exists at MTOCs, we asked if the compensatory abilities of AURKA and AURKC were  
122 reciprocal.

123 To test if AURKC can compensate for loss of AURKA, and to further understand  
124 the role of AURKA during meiosis in mouse oocytes, we generated a mouse strain that  
125 lacks *Aurka* [16] specifically in oocytes using *Gdf9*-mediated Cre excision [31].  
126 Consistent with AURKA being the most abundant AURK in oocytes [29], we  
127 demonstrate that AURKA is essential for oocyte maturation through fragmenting  
128 MTOCs, building the LISD and triggering cleavage of cohesin in an APC/C-independent  
129 manner. Moreover, we demonstrate that that AURKB and AURKC cannot compensate  
130 for loss of AURKA. Therefore, AURKA is the only Aurora kinase essential for MI in  
131 mouse oocytes.  
132

## 133 RESULTS

### 134 Generation and confirmation of mice lacking *Aurka* in oocytes

135 Because AURKA can function in the CPC in the absence of AURKB and AURKC  
136 [29], we asked if similar compensatory functions exist in the absence of AURKA. Prior  
137 AURKA studies used small-molecule inhibitors such as MLN8237 and overexpression  
138 to investigate AURKA's role in mouse oocyte meiotic maturation which do not allow for  
139 compensation studies [8, 21, 22, 24, 26, 29, 32]. To assess compensation and potential  
140 AURKA-specific requirements, we deleted *Aurka* (*Aurka<sup>fl/fl</sup>*) using *Gdf9-Cre*. *Gdf9*  
141 expression begins around day 3 after birth in prophase I-arrested oocytes; these  
142 oocytes already completed early prophase I events such as chromosome synapsis and  
143 recombination. *Aurka* is therefore deleted in growing oocytes prior to completion of  
144 chromosome segregation in meiosis I. To confirm that AURKA was depleted from  
145 oocytes, we first assessed total AURKA levels by Western blotting. When normalized to  
146 the AURKA signal in oocytes from wild-type (WT; *Aurka<sup>fl/fl</sup>*) littermates, the signal in  
147 *Aurka* knockout (KO; *Aurka<sup>fl/fl</sup> Gdf9-Cre*) oocytes was at background levels (Fig. 1A-B).  
148 We also assessed the presence of AURKA at Metaphase I (Met I) by  
149 immunocytochemistry. In WT oocytes, AURKA localized to Met I spindle poles.  
150 Compared to WT, *Aurka* KO oocytes lacked AURKA signal (Fig. 1C-D). Finally, we  
151 measured the activity of AURKA by immunostaining oocytes with anti-phosphorylated  
152 CDC25B-serine 351 (pCDC25B), an AURKA substrate that localizes to spindle poles  
153 [33]. Consistent with the loss of polar AURKA, there was no detectable pCDC25B in  
154 *Aurka* KO oocytes (Fig. 1E-F). These data indicate that *Gdf9*-mediated Cre excision of  
155 *Aurka* is sufficient to deplete AURKA in mouse oocytes.

156

### 157 ***Aurka*-oocyte knockout mice are sterile**

158       To determine the consequence of deleting *Aurka* in mouse oocytes, we  
159 conducted fertility trials. Age-matched WT and KO females were mated to WT  
160 B6D2F1/J males of proven fertility and the numbers of pups born were recorded. We  
161 carried out this fertility trial for the time it took WT females to produce 5 litters (~4  
162 months). Compared to WT females that produced ~6 pups/litter, *Aurka* KO females  
163 never produced a pup (Table 1). Therefore, in contrast to AURKB and AURKC [28, 29],  
164 oocyte expressed AURKA is essential for female fertility.

165       To understand the cause of sterility, we first evaluated follicle development in  
166 histological sections of ovaries from females at different ages (1m, 2m, 6m). Of note,  
167 the animals used for histological sampling at 6 months were the females used the  
168 fertility trial. Compared to age-matched WT animals, there were no significant  
169 differences in the number of follicles at different developmental stages (Fig. 2A-F).  
170 Importantly, *Aurka* KO ovaries contained corpus luteum (CL), indicating that these  
171 females can ovulate. However, *Aurka* KO ovaries had 50% reduction in the number of  
172 CL in comparison to WT (Fig. 2C-F) suggesting that not all oocytes in fully developed  
173 follicles were ovulated. Taken together, these data indicate that the remaining Aurora  
174 kinases, AURKB and AURKC cannot compensate for loss of AURKA.

175

### 176 **AURKA has unique functions during meiosis I**

177       Because *Aurka* KO females are sterile but ovulate, we next assessed the quality  
178 of the ovulated cells. We induced ovulation through hormonal stimulation and harvested



179 cells from oviducts. In this strain background, ~80% of cells in oviducts from WT mice  
180 contained polar bodies (Fig. 3A-B), indicating a completion of meiosis I (MI) and arrest  
181 at Metaphase of meiosis II (Met II). In contrast, none of the cells from KO oviducts had  
182 polar bodies, and they all were arrested in Met I, indicating a failure to complete MI (Fig.  
183 3A-B). We note that similar number of cells were obtained from WT and KO oviducts  
184 (Table 1).

185 To identify where in MI *Aurka* KO oocytes were failing, we examined oocytes that  
186 were matured *in vitro* for a time in which WT oocytes would reach the Met II arrest. We  
187 isolated similar numbers of prophase I-arrested oocytes from WT and KO females,  
188 consistent with the ovarian reserve not being affected (Table 1). After maturation, WT  
189 oocytes extruded polar bodies *in vitro*. In contrast, none of *Aurka* KO oocytes extruded  
190 polar bodies (Fig. 3A, C). We did not observe a difference between WT and KO oocytes  
191 in the percentage of oocytes that resumed meiosis and broke down their nuclear  
192 envelopes (Fig. 3D). These results indicate that AURKA is essential for meiotic  
193 maturation.

194 To further confirm that AURKB/C cannot compensate for loss of AURKA, we  
195 microinjected cRNAs encoding *Egfp* fusions of *Aurka*, *Aurkb*, or *Eyfp* fusion of *Aurkc*  
196 into *Aurka* KO oocytes. We then visualized bipolar spindle formation and chromosome  
197 segregation via live light-sheet microscopy (Fig. 3E-F and Movie S1). As expected, 80%  
198 of oocytes from WT mice completed MI, extruded a polar body and reached Met II. In  
199 contrast, none of the *Aurka* KO oocytes extruded a polar body and remained arrested at  
200 Met I. Exogenously expressed AURKA-EGFP localized to MTOCs and decorated MI  
201 spindle poles in *Aurka* KO oocytes. Importantly, AURKA-EGFP expression rescued

202 nearly all *Aurka* KO oocytes because they extruded polar bodies and arrested at Met II  
203 (Fig. 3F). Ectopic expression of AURKB-EGFP or AURKC-EGFP, however were unable  
204 to rescue MI failure and none of these oocytes extruded a polar body. We were  
205 surprised that exogenous expression of AURKC-EGFP could not rescue the ability to  
206 complete MI, because a sub-population of AURKC localizes to meiotic spindle poles  
207 [20] (Figs. 2E and S1) and the AURKs have some overlapping substrate specificity [34].  
208 This failure to rescue suggests that AURKA and AURKC have unique functions that are  
209 likely spatially distinct at the poles.

210

### 211 ***Aurka* KO oocytes are defective in MI spindle building**

212 To determine what unique functions AURKA is required for, we next evaluated  
213 spindle formation using immunofluorescence staining of fixed oocytes. Inhibition of  
214 AURKA with MLN8237 causes MI spindle defects, ranging from bipolar spindles of  
215 reduced length, spindles with multiple poles and to monopolar spindles [8,  
216 26] (Fig. S2A-B). We matured oocytes for the time it took the WT oocytes to reach early  
217 pro-Metaphase I (pro-Met I) (3h), late pro-Met I (5h), and Met I (7h) stages *in vitro* prior  
218 to fixation (Fig. 4A). We observed differences between oocytes in early pro-Met I. At this  
219 first time point, chromosomes in WT oocytes resolved from one another, consistent with  
220 the presence of a microtubule ball that makes transient interactions with chromosomes  
221 (Fig. 4A-B). The microtubule ball was associated with multiple small,  $\gamma$ -Tubulin-positive  
222 MTOCs indicating that MTOC fragmentation occurred [10]. In contrast, the  
223 chromosomes in the majority of *Aurka* KO oocytes did not resolve from one another at  
224 early pro-Met I (Fig. 4B). There were fewer and larger  $\gamma$ -Tubulin foci indicating a failure

225 to fragment MTOCs. Next, when WT oocytes transitioned from pro-Met I to Met I, the  
226 spindles elongated while chromosomes aligned at the Met I plate. Multiple MTOCs  
227 fused together to form two well-defined poles. *Aurka* KO oocytes, however, either had a  
228 persistent small microtubule ball with unresolved chromosomes or had elongated  
229 spindles. Interestingly, both types of spindles always had 1-2 MTOCs that did not  
230 fragment and that were not sorted into spindle poles. When we quantified the  
231 distribution of these two spindle phenotypes in KO oocytes, ~55% had monopolar  
232 spindles, and ~45% had short bipolar spindles after 7h of meiotic maturation (Fig. 4C).  
233 We also quantified these spindle phenotypes using length and volume measurements.  
234 *Aurka* KO oocytes had significantly shorter bipolar spindles (29.54  $\mu\text{m}$  vs 15.92  $\mu\text{m}$ , WT  
235 and KO, respectively) and reduced spindle volume (1219  $\mu\text{m}^3$  vs 438.8  $\mu\text{m}^3$ , WT and  
236 KO, respectively) compared to WT oocytes (Fig. 4D-E).

237 To determine if these spindle defects reflect unique AURKA functions, we used  
238 these same spindle quantification parameters to assess if the ectopic expression of  
239 each of the Aurora kinases can rescue specific steps of meiotic spindle building.  
240 Expression of AURKA rescued all the defects: MI spindle volume was restored,  
241 chromosomes resolved from one another with WT-like kinetics, and a stable, bipolar MI  
242 spindle formed (Fig. 3E, 4F-J, Movie S1). Expression of AURKB-EGFP failed to rescue  
243 all of these parameters. Interestingly, expression of AURKC-EGFP partially rescued the  
244 time in which some *Aurka* KO oocytes formed a bipolar spindle (Fig. 4H), although the  
245 total number of oocytes that could maintain a bipolar spindle through Met I did not  
246 significantly improve (Fig. 4I). Taken together, these results suggest that AURKA is  
247 uniquely needed for MTOC fragmentation and building a bipolar MI spindle.

248

249 **AURKA is required to fragment MTOCs through PLK1 and to form the LISD**

250       Because our analyses showed that *Aurka* KO oocytes are defective in MTOC  
251 fragmentation, we further investigated this phenotype using high-resolution light-sheet  
252 microscopy (Movie S2). Oocytes expressed H2B-mCherry, CDK5RAP2-Egfp and were  
253 stained with a fluorogenic drug, SiR-tubulin, for visualization of chromosomes, MTOCs,  
254 and microtubules, respectively (Fig. 5A). For technical reasons, we started live imaging  
255 40-50 minutes after meiotic maturation began which corresponded to 10-20 minutes  
256 prior to nuclear envelope break down in WT oocytes. Typically, at this time in control  
257 oocytes, one large dominant MTOC and multiple small MTOCs were present in the  
258 cytoplasm and a few smaller MTOCs were in the perinuclear region (Fig. 5A). When  
259 oocytes exited prophase I, as marked by nuclear envelope break down and  
260 chromosome condensation, the majority of cytoplasmic MTOCs including the dominate  
261 MTOC, moved toward the condensing chromosomes. As a result, a microtubule ball  
262 formed, and chromosomes resolved. As control oocytes transited from pro-Met I to Met  
263 I, MTOCs sorted, spindles elongated and finally MTOCs fused to form two spindle  
264 poles. In contrast, and consistent with our previous result (Fig. 4A), *Aurka* KO oocytes  
265 lacked multiple cytoplasmic MTOCs and had only 1-2 large MTOCs at the time of  
266 meiotic resumption. *Aurka* KO oocytes never fragmented the large MTOC (0/16 MTOC  
267 fragmentation in KO vs 12/12 MTOC fragmentation in WT) (Fig. 5A; Movie S2).

268       Because of the technical limitations of being unable to image live oocytes  
269 immediately after induction of meiotic maturation, and because we immediately  
270 observed multiple cytoplasmic MTOCs in control but not *Aurka* KO oocytes, we

271 compared the number of MTOCs in prophase I-arrested oocytes after fixation and  
272 immunostaining. Both in WT and KO groups we found 1-2 large MTOCs (Fig. S3),  
273 suggesting that MTOC defects do not occur during oocyte growth but, instead the first  
274 defect in *Aurka* KO oocytes is the inability to fragment MTOCs upon exiting from  
275 prophase I.

276 To understand the role of AURKA in MTOC fragmentation, we evaluated the  
277 MTOC regulatory pathway in more detail. Similar to *Aurka* KO oocytes, *Plk1* KO oocytes  
278 also arrest in MI with short spindles and have deficiencies in fragmenting MTOCs [35].  
279 Because AURKA can activate PLK1 via phosphorylation of Threonine 210 [36], we  
280 reasoned that AURKA functions upstream of PLK1 in mouse oocytes. To test this  
281 hypothesis, we performed immunocytochemistry to detect the activated form of PLK1  
282 (pPLK1) in WT and *Aurka* KO oocytes. Consistent with our hypothesis, PLK1-T210  
283 phosphorylation was significantly decreased in *Aurka* KO oocytes at MTOCs (Fig. 5B,  
284 C). These data suggest that AURKA regulates MTOC fragmentation by phosphorylating  
285 and thereby activating PLK1 after NEBD.

286 Next, we used super resolution microscopy to understand the consequences of  
287 the failure of MTOC fragmentation on Met I spindle pole structure by assessing PCM  
288 components pericentrin (PCNT) and CEP215 [26]. WT oocytes had two poles, each of  
289 which had the characteristic broad MTOC structure of Met I oocytes. In contrast, *Aurka*  
290 KO oocytes had one hyper-condensed spindle pole, with reduced volume and width  
291 (Fig. 5D-F). These results are consistent with previous findings that show a collapse of  
292 spindle poles after AURKA inhibition [26]. Because we observed changes in the  
293 structure of spindle poles in *Aurka* KO oocytes, we used STED-based microscopy to

294 evaluate if AURKA is required for the organization of PCM components. We evaluated  
295 the levels of colocalization between CEP215 and PCNT by measuring the covariance in  
296 the signal intensity between the two proteins (Pearson coefficient) and by measuring the  
297 proportion of overlap of one protein with respect to the other (Manders coefficient).  
298 However, we did not observe statistically significant differences in the patterns of  
299 colocalization between WT and KO oocytes (Fig. 5G-J), suggesting that the  
300 arrangement of these PCM components is not controlled by AURKA.

301         Recent evidence indicates that the MI spindle has phase-separated structures  
302 that aid in its formation [8]. A key component and marker of this liquid-like spindle  
303 domain (LISD) is TACC3, a known AURKA substrate [19, 34, 37]. Consistent with this  
304 connection, inhibition of AURKA with MLN8237 disrupted the LISD in mouse oocytes.  
305 We therefore evaluated if the LISD property was disrupted in *Aurka* KO oocytes. Upon  
306 probing WT and *Aurka* KO oocytes with anti-TACC3 antibodies, we found loss of  
307 TACC3 signal, corroborating a function of AURKA in coordinating the LISD during MI  
308 (Fig. 5K-L). Taken together, these results indicate that AURKA is required to build a  
309 proper MI spindle through controlling the initial step of fragmenting MTOCs and  
310 formation of a LISD.

311

### 312 **AURKA regulates REC8 cleavage independent of the APC/C**

313         Finally, we evaluated a potential mechanism that would cause the failure to  
314 extrude a polar body, despite some oocytes appearing to have small, bipolar spindles.  
315 One possibility is the spindle assembly checkpoint (SAC). Insufficient tension between  
316 kinetochores and microtubules activates an error-correction pathway involving

317 AURKB/C which triggers detachment of MTs from kinetochores. This loss of  
318 kinetochore-microtubule (K-MT) attachments activates the SAC [38] and results in cell-  
319 cycle arrest preventing anaphase I. We suspected the arrest in *Aurka* KO oocytes was  
320 due to a lack of tension from monopolar and short spindles. We investigated the  
321 strength of the SAC in Met I by evaluating MAD2 signals at kinetochores (Fig. 6A).  
322 When normalized to kinetochore signal *Aurka* KO oocytes had significantly higher  
323 MAD2 than WT oocytes (Fig. 6B). These data suggest persistent SAC activity in KO  
324 oocytes, likely due to a defective spindle and the loss of tension.

325         Next, to assess whether the Met I arrest in *Aurka* KO oocytes is solely due to  
326 persistent SAC activation, we treated oocytes with reversine to inhibit monopolar  
327 spindle 1 (MPS1) kinase, a protein required for initiating the SAC signaling complex [39,  
328 40]. We monitored chromosome segregation, spindle formation and polar body  
329 extrusion by light-sheet live imaging (Movies S3-4). As a read-out of Anaphase-  
330 Promoting Complex/Cyclosome (APC/C) activity, we also monitored the destruction of  
331 securin-EGFP (Fig. 6C). Ninety-five percent of WT oocytes rapidly degraded securin-  
332 EGFP (Fig. 6C-E) before anaphase I and extruded the first polar body (Fig. 6F).  
333 Anaphase I onset occurred ~9h post-NEBD in this imaging system (Fig. 6G). In  
334 contrast, all *Aurka* KO oocytes remained arrested at Met I (Fig. 6F) and had only minor  
335 decreases (~10%) in securin-EGFP demonstrating minimal APC/C activity (Fig. 6D-E).  
336 Note that in the one WT oocyte that remained arrested in Met I, a similar minor  
337 decrease in securin-EGFP also occurred (Fig. 6D-E). As expected, in WT oocytes,  
338 reversine-treatment accelerated the onsets of both securin-EGFP destruction (Fig. 6D,  
339 E) and anaphase I by 2-3h (Fig. 6G); all oocytes extruded the first polar body (Fig. 6F).

340 To our surprise, although reversine-treatment restored securin-EGFP destruction in  
341 *Aurka* KO oocytes (Fig. 6D-E), 64% of these oocytes did not enter Anaphase I and did  
342 not extrude a polar body (Fig. 6F). Of the remaining 36% *Aurka* KO oocytes treated with  
343 reversine that did enter Anaphase I (Fig. S4A, B; Movie S4), only one-half (18%)  
344 extruded the first polar body. The remaining 18% either did not extrude the first polar  
345 body or they extruded it, but they then failed cytokinesis and retracted it back into the  
346 cytoplasm (Fig. 6F). Importantly, regardless of the polar body extrusion outcome, the  
347 APC/C activities in all WT and *Aurka* KO oocytes treated with reversine were similar  
348 (Fig. 6E). These data suggest that the Met I arrest in the majority (64%) of *Aurka* KO  
349 oocytes treated with reversine cannot be explained by insufficient APC/C activity.

350 To determine what other functions AURKA may have in controlling anaphase I  
351 onset, we speculated that AURKA could also directly regulate chromosome  
352 segregation. To undergo anaphase onset, cohesin must be cleaved by separase, which  
353 is controlled by APC/C-mediated destruction of securin. When we evaluated the levels  
354 of REC8, a meiosis-specific cohesin subunit, in *Aurka* KO oocytes treated with  
355 reversine, we found that chromosome-localized REC8 was only reduced by ~ 35% (Fig.  
356 6H-I). These data suggest that AURKA regulates the cleavage of cohesin in an APC/C-  
357 independent manner as it does in mitotic cells [41]. Therefore, these data demonstrate  
358 that the SAC is not the sole mediator of the Met I arrest in *Aurka* KO oocytes.

359 In summary, we conclude that AURKA is the only Aurora kinase in mouse  
360 oocytes that is essential for fertility and MI [28, 29] (Fig. 7). Its unique functions include  
361 initiating MTOC fragmentation through activation of PLK1, spindle formation through



362 regulating TACC3 and the LISD, and anaphase onset through regulating REC8  
363 cleavage. These functions are essential for spindle building and completion of MI to  
364 generate a healthy, euploid egg.

365

## 366 **DISCUSSION**

367 Together with our previous description of *Aurkb* and *Aurkc* double knockout  
368 oocytes [29], we demonstrate here that AURKA is the only essential Aurora kinase  
369 required for mouse female fertility and oocyte meiotic maturation. Although these KO  
370 females are sterile, they do ovulate, albeit MI-arrested oocytes. In *Aurkc*<sup>-/-</sup> oocytes,  
371 AURKA and AURKB compensate, and in *Aurkb*<sup>-/-</sup> oocytes, AURKA and AURKC  
372 activities are up-regulated. Furthermore, in double *Aurkb/Aurkc* knockout oocytes  
373 AURKA compensates [28, 29]. Intriguingly, there is no compensatory mechanism for  
374 loss of *Aurka*. Specifically, we show that AURKA is needed at the beginning of meiotic  
375 resumption for spindle building. AURKA is required for PLK1 activation to initiate MTOC  
376 fragmentation and regulates TACC3, likely through phosphorylation, to organize the  
377 LISD. Surprisingly, if the SAC is satisfied, AURKA is also required later for Anaphase I  
378 onset to trigger efficient cleavage of cohesin by an unknown mechanism (Fig. 7).  
379 Collectively, these data imply AURKA-specific substrates or regulatory partner binding  
380 that cannot be carried out by the other 2 Aurora kinases.

381 Substrate phosphorylation by the AURKs is regulated in at least three ways: 1)  
382 activation via autophosphorylation, 2) binding to regulator proteins, and 3) phospho-site  
383 consensus motifs. Aurora kinase activity depends on T-loop autophosphorylation and  
384 binding to regulatory proteins such as TPX2 and INCENP. These regulatory proteins

385 dictate the subcellular localization of the kinases where they can then access their  
386 substrates [42-46]. AURKB and AURKC bind INCENP and function in the CPC at  
387 chromosomes and kinetochores, whereas AURKA binds MT-binding proteins like TPX2  
388 and functions on spindles and at spindle poles (MTOCs), where AURKA complexes with  
389 PCM proteins exist. The binding affinities for these regulatory proteins are governed by  
390 the hydrophilicity of an amino acid in kinase subdomain IV [47, 48]. Substitution of this  
391 amino acid in AURKA changes the TPX2-dependent polar localization to INCENP-  
392 dependent kinetochore localization. This change in localization allows AURKA to  
393 compensate in *AURKB*-depleted HeLa cells. Interestingly, the reciprocal residue  
394 alteration in AURKB did not facilitate TPX2-binding, and AURKB therefore cannot carry  
395 out AURKA function possibly because it cannot activate upon TPX2 association like  
396 AURKA can [49]. In our mouse oocyte studies, we observed similar results: AURKA can  
397 carry out CPC functions [29], but AURKB/C cannot carry out AURKA spindle pole  
398 functions (Fig. 7). Importantly, and different from the HeLa cell experiments, the  
399 AURKA-CPC function occurs without amino acid substitution. We speculate that this  
400 ability arises because AURKA is the most abundant of the three AURKs in oocytes and  
401 there is therefore likely a soluble pool of free AURKA available to bind INCENP when  
402 competition is absent.

403         The third way Aurora kinase phosphorylation is regulation is through sequence  
404 specificity for substrates [50, 51]. SILAC-based phosphoproteomics of HeLa cells,  
405 revealed that there are many hundreds of AURKA and AURKB substrates and that their  
406 phospho-site consensus motifs are similar but distinct. For example, ~91% of AURKA-  
407 dependent phospho-peptides contain a R-R-X-p[S/T] motif, whereas only 8% of the

408 AURKB-dependent phospho-peptides contain this motif. Instead, most AURKB-  
409 dependent phospho-peptides contained [R/K]-p[S/T]. Therefore, although the motifs are  
410 similar, AURKA prefers an arginine at the -2 position and does not prefer a basic amino  
411 acid at the -1 position [34]. However, we demonstrated that when AURKA is the sole  
412 Aurora kinase in mouse oocytes it can compensate, indicating that AURKA substrate  
413 specificity is flexible. This flexibility is consistent with spindle-pole-localized AURKA  
414 triggering MT depolymerization at kinetochores [32, 52], a role that AURKB executes at  
415 centromeres, and therefore likely through the same protein substrates. In contrast,  
416 because AURKB and AURKC cannot compensate for loss of AURKA, even when  
417 overexpressed, this consensus-motif flexibility may not be shared. Alternatively, if  
418 AURKA occupies part of the LISD, it is possible that the regulatory protein that dictates  
419 this particular localization cannot bind and/or activate AURKB/C. Additional subcellular  
420 targeting of these kinases could help resolve these mechanistic questions.

421         Because of the number of possible AURKA substrates, it is likely that KO spindle  
422 phenotypes arise from a massive change in substrate phosphorylation and downstream  
423 function. For example, we show that PLK1 is not activated in *Aurka* KO oocytes. PLK1  
424 is a known AURKA substrate. PLK1 is required to promote mitotic entry and centrosome  
425 maturation through phosphorylation, one substrate being AURKA in a positive feedback  
426 loop [53-56]. *Plk1* knockout in mouse oocytes share many phenotypes with the *Aurka*  
427 KO oocytes [35]. These phenotypes include sterility, MI arrest with short spindles, and  
428 an inability to fragment MTOCs. KIF11 (also known as Eg5) is required for the  
429 fragmentation step which occurs after the nuclear envelope breaks down [10], and is a  
430 known AURKA substrate in *Xenopus oocytes* [57]. It is therefore likely that a failure to

431 phosphorylate KIF11 can explain the subset of oocytes that retain a monopolar spindle.  
432 However, one-half of the oocytes do form bipolar spindles, although they are short. This  
433 phenotype suggests that some AURKA-independent MTOC fragmentation can occur,  
434 which is not detectable in our imaging system, so that they can form two poles or that  
435 chromatin-nucleated microtubules can cluster at their minus ends to form a pole. We  
436 also observed short MI spindles in oocytes that lacked *Aurkb/c* where AURKA left the  
437 spindle poles and localized to chromosomes to function in the CPC [29]. In mitotic cells,  
438 phosphorylation of TPX2 by AURKA is required for MT flux, a function that maintains  
439 spindle length [58]. Therefore, in the oocytes with short, bipolar spindles, it is possible  
440 that loss of AURKA-TPX2-dependent MT flux has occurred. Moreover, the oocytes with  
441 short spindles fail to exit MI even though the APC/C is activated. Another reason of why  
442 *Aurka* KO oocytes arrest in MI could be the inability to remove the cohesin proteins that  
443 hold homologous chromosomes together. The APC/C releases separase from an  
444 inhibitory complex so that it can cleave the cohesin on chromosome arms. Interestingly,  
445 the levels of cohesin in *Aurka* KO oocytes where the APC/C was activated were slightly  
446 reduced but not completely absent, suggesting that AURKA is involved directly or  
447 indirectly in the cleavage of cohesin to trigger Anaphase I onset. In somatic cells,  
448 overexpression of AURKA induces loss of cohesin at chromosomes arms by  
449 phosphorylating histone H3 at threonine 118 [41]. However, further studies are needed  
450 to understand how AURKA regulates cohesin cleavage in mouse oocytes. Finally,  
451 another known substrate of AURKA in *Xenopus*, and likely mouse oocytes, is  
452 cytoplasmic polyadenylation element binding protein I (CPEB1) [59, 60]. When  
453 phosphorylated by AURKA, CPEB1 activates translation of maternal RNAs. In mouse,

454 this burst of translation occurs during oocyte meiotic maturation and is required for  
455 completion of MI. Examination of this role in translation in *Aurka* KO oocytes will help  
456 explain this cell-cycle arrest.

457 In summary, we demonstrate that of the 3 Aurora kinases, AURKA is the only  
458 essential isoform. This is likely because AURKA regulator partner binding and substrate  
459 specificity appear to be more flexible than the other 2 kinases. Because AURKC also  
460 localizes to MTOCs, a failure to rescue *Aurka* KO oocytes, even when overexpressed,  
461 implies that AURKC is not required for MTOC fragmentation or the LISD, and carries  
462 out unknown MTOC and spindle building functions. Identification of MTOC binding  
463 partners and substrates will be essential to understanding how AURKA and AURKC  
464 coordinate meiotic spindle building.

465

466

467

## 468 MATERIALS AND METHODS

### 469 Generation of mouse strains and genotyping

470 Mice possessing *loxP* sites flanking exon 2 of the *Aurka* gene [16] were obtained from  
471 Jackson Laboratories (B6.129-*Aurka*<sup>tm1.1Tvd/J</sup>, #017729). To generate *Aurka*<sup>fl/fl</sup> Gdf9-  
472 Cre mice, female mice carrying the *Aurka* floxed alleles were crossed with Gdf9-Cre  
473 males (Jackson Laboratories Tg (Gdf9-icre)5092Coo/J, #011062). Animals were  
474 maintained following the Rutgers University Institutional Animal Use and Care  
475 Committee (Protocol 201702497), National Institutes of Health guidelines, and the  
476 policies of the Expert Committee for the Approval of Projects of Experiments on Animals  
477 of the Academy of Sciences of the Czech Republic (Protocol 43/2015). These  
478 regulatory bodies approved all experimental procedures involving the animals. Mice  
479 were housed in 12-12 h light-dark cycle, with constant temperature and with food and  
480 water provided *ad libitum*. All animal experiments performed in this study were  
481 approved by the Rutgers IACUC. Genotyping for *LoxP* and *Cre* were carried out using  
482 PCR amplification. Primers for *Aurka LoxP* (Forward: 5' -  
483 CTGGATCACAGGTGTGGAGT- 3', Reverse: 5' – GGCTACATGCAGGCAAAC A - 3'),  
484 and *Gdf9-Cre* (Forward: 5' - TCTGATGAAGTCAGGAAGAAC C- 3', Reverse: 5' -  
485 GAGATGTCCTTCACTCTGATT C-3', Internal control Forward: 5' -  
486 CTAGGCCACAGAATTGAAAGATCT- 3', Internal control Reverse: 5' - GTAGGTGGA  
487 AATTCTAGCATCATC C- 3') were used at 20 pMol using FastMix French PCR beads  
488 (Bulldog Bio, #25401) following manufacturer's protocol.

### 489 Fertility trials

490 Sexually mature wild-type *Aurka*<sup>fl/fl</sup> and *Aurka*<sup>fl/fl</sup>;Gdf9-Cre (*Aurka* KO) female mice ages  
491 5 to 13 weeks were continuously mated to wild type B6D2 (Jackson Laboratories  
492 B6D2F1/J, #100006) male mice with proven fertility until a total of 5 litters were  
493 produced by WT female mice. Average age of female mice at the end of the fertility  
494 trials was 6 months.

#### 495 **Oocyte collection, culture, and microinjection**

496 Fully grown, prophase I-arrested oocytes were collected from the ovaries of mice  
497 ranging in age from 3 to 12 weeks. To prevent spontaneous meiotic resumption during  
498 collection, 2.5  $\mu$ M milrinone (Sigma-Aldrich #M4659) was added to minimal essential  
499 medium (MEM). To induce meiotic resumption, oocytes were cultured in milrinone-free  
500 Chatot, Ziomek, and Bavister (CZB) [61] medium in an atmosphere of 5% CO<sub>2</sub> in air at  
501 37 °C. Oocytes were matured for 7.5 hours for metaphase I experiments and 16 hours  
502 for Metaphase II experiments.

503 To obtain oocytes for live light-sheet time lapse imaging, prophase I-arrested oocytes  
504 were obtained as described above and oocytes were collected and microinjected in M2  
505 medium (Sigma-Aldrich) and cultured in MEM medium (Sigma-Aldrich) supplemented  
506 with 1.14 mM sodium pyruvate (Sigma-Aldrich), 4 mg/ml bovine serum albumin (Sigma-  
507 Aldrich), 75 U/ml penicillin (Sigma-Aldrich) and 60  $\mu$ g/ml streptomycin (Sigma-Aldrich),  
508 at 37 °C in a 5% CO<sub>2</sub> atmosphere. Oocytes were stained with 100 nM SiR-tubulin  
509 (Spirochrome) for microtubule visualization; SiR-tubulin was added to the culture  
510 medium. For the securin degradation analysis, a final concentration of 1  $\mu$ M reversine  
511 (Sigma-Aldrich) was added to the oocytes.

512 For induced ovulation and collection of metaphase II eggs, female mice (>6 wks age)  
513 were injected with 5 I.U. of pregnant mare's serum gonadotropin (PMSG) (Lee  
514 Biosolutions #493-10) followed by 5 I.U. of human chorionic gonadotropin (hCG)  
515 (Sigma-Aldrich #CG5) 47 h later. 14-16 h post hCG injection, eggs were collected from  
516 the oviducts in MEM/polyvinylpyrrolidone media containing 3 mg/ml hyaluronidase  
517 (Sigma-Aldrich, #H3506) in MEM for 5 min. Eggs were then washed free of  
518 hyaluronidase and allowed to recover in MEM/polyvinylpyrrolidone media prior to  
519 fixation.

520

521 To inhibit AURKA, MLN8237 (Alisertib, Selleckchem #S1133) was added to CZB culture  
522 media at a final concentration of 1  $\mu$ M. To inhibit the SAC, reversine (Cayman Chemical  
523 Research #10004412) was added to CZB culture media at a final concentration of 1  $\mu$ M.  
524 Dimethyl sulfoxide (Sigma Aldrich #472301) was used as a control in the same dilution  
525 factor (1:1,000).

526

527 After removing the cumulus cells, oocytes were microinjected in M2 medium with ~10 pl  
528 of 50 ng/ $\mu$ l *H2b-mCherry*, 125 ng/ $\mu$ l *Egfp-Cdk5rap2*, 100 ng/ $\mu$ l *Aurka-Gfp*, 100 ng/ $\mu$ l  
529 *Aurkb-Gfp*, 100 ng/ $\mu$ l *Aurkc-Yfp*, 75 ng/ $\mu$ l *securin-Gfp* cRNAs. Microinjected oocytes  
530 were cultured for 3 h in MEM medium supplemented with Milrinone to allow protein  
531 expression prior to experimental procedures.

532

533 **Plasmids**



534 To generate cRNAs, plasmids were linearized and *in vitro* transcribed using a  
535 mMessage mMachine T3 (Ambion #AM1348) and T7 kits (Ambion #AM1344),  
536 according to manufacturer's protocol. The synthesized cRNAs were then purified using  
537 an RNAeasy kit (Qiagen #74104) and stored at -80 °C. The pYX-EGFP plasmid was  
538 created by transferring T3-T7 cassette from pRNA-EGFP vector [62] into the pXY-Asc  
539 vector (NIH, Bethesda, MD, USA) using PCR cloning. The pYX-EYFP plasmid was  
540 created from pYX-EYFP plasmid by replacing coding sequence for EGFP by EYFP.  
541 AURKC coding sequence [29] was cloned by PCR into pYX-EYFP to create pYX-  
542 AURKC-EYFP plasmid. pIVT-AURKB/C-EGFP and pGEMHE-mEGFP-mCDK5RAP2  
543 plasmids were described previously [20, 29].

544

#### 545 **Western blotting**

546 A total of 100 prophase-I arrested oocytes were pooled and mixed with Laemmli sample  
547 buffer (Bio-Rad, cat #161-0737) and denatured at 95°C for 10 min. Proteins were  
548 separated by electrophoresis in 10% SDS polyacrylamide precast gels (Bio-Rad, #456-  
549 1036). The separated polypeptides were transferred to nitrocellulose membranes (Bio-  
550 Rad, #170-4156) using a Trans-Blot Turbo Transfer System (Bio-Rad) and then blocked  
551 with 2% ECL blocking (Amersham, #RPN418) solution in TBS-T (Tris-buffered saline  
552 with 0.1% Tween 20) for at least 1h. The membranes were incubated overnight using  
553 the antibody dilution anti-AURKA (1:500; Bethyl #A300-072A), or 1 h with anti-MSY2  
554 (1:20,000; gift from R. Schultz) as a loading control. After washing with TBS-T five  
555 times, the membranes were incubated with anti-rabbit secondary antibody (1:1000;  
556 Kindle Bioscience, #R1006) for 1 h followed with washing with TBS-T five times. The

557 signals were detected using the ECL Select western blotting detection reagents (Kindle  
558 Bioscience, #R1002) following the manufacturers protocol. Membranes were stripped  
559 prior to loading control detection using Blot Stripping Buffer (ThermoFisher Scientific  
560 #46430) for 30 minutes at room temperature.

561

## 562 **Immunocytochemistry**

563 Following meiotic maturation, oocytes were fixed in PBS containing paraformaldehyde  
564 (PFA) at room temperature (CREST,  $\alpha$ -tubulin: 2% PFA for 20 mins; TACC3, CEP192:  
565 2% PFA for 30 min; phosphorylated PLK1-T210: 2% PFA + 0.1% Triton-X for 20 mins;  
566 Pericentrin, phosphorylated CDC25B-S353 and  $\gamma$ -tubulin, CEP215: 3.7% PFA for 1 h),  
567 PHEM (PIPES 60mM, HEPES 25mM, EGTA 10mM, and  $MgCl_2$  2mM) containing  
568 paraformaldehyde (MAD2: 2% PFA for 20 mins) or 100% Methanol for 10 min for  
569 AURKA followed by 3 consecutive washes through blocking buffer (PBS + 0.3% (wt/vol)  
570 BSA + 0.1% (vol/vol) Tween-20). Prior to immunostaining, oocytes were permeabilized  
571 for 20 min in PBS containing 0.1% (vol/vol) Triton X-100 and 0.3% (wt/vol) BSA followed  
572 by 10 min in blocking buffer. Immunostaining was performed by incubating cells in  
573 primary antibody for 1 h a dark, humidified chamber at room temperature or overnight at  
574 4°C followed by 3 consecutive 10 min incubations in blocking buffer. After washing,  
575 secondary antibodies were diluted 1:200 in blocking solution and the sample was  
576 incubated for 1 h at room temperature. After washing, the cells were mounted in 5  $\mu$ L  
577 VectaShield (Vector Laboratories, #H-1000) with 4', 6- Diamidino-2-Phenylindole,  
578 Dihydrochloride (DAPI; Life Technologies #D1306; 1:170).

579

## 580 **Chromosome spreads**

581 Chromosome spreads was performed as previously described [63]. *Aurka* KO oocytes  
582 were matured *in vitro* for 16 h in DMSO or reversine 1  $\mu$ M and were treated with Acidic  
583 Tyrode's solution (Millipore Sigma; MR-004-D) to remove the zona pellucida. Then,  
584 oocytes were transferred to a drop of chromosome spread solution (0.16% Triton-X-  
585 100, 3 mM DTT (Sigma-Aldrich, 43815), 0.64% paraformaldehyde in distilled water) on  
586 glass slides and allowed to slowly air dry prior to processing for immunofluorescence  
587 staining. Immunostaining of chromosome spread was performed by washing the slide  
588 two times with PBS for 10 min and blocking the slide in PBS supplemented with BSA  
589 3% for 10 min. Primary antibody to detect REC8 was administered for 3 h in a dark,  
590 humidified chamber at room temperature, followed by three washes in PBS of 10 min  
591 each. Secondary antibody was applied for 1.5 h in a dark, humidified chamber at room  
592 temperature followed by three washes in PBS of 10 min each. After washing, the slide  
593 was mounted in Vectashield containing DAPI (Life Technologies, #D1306)

594

## 595 **Antibodies**

596 The following primary antibodies were used for immunofluorescence (IF) experiments:  
597 mouse anti  $\alpha$ -tubulin Alexa-fluor 488 conjugated (1:100; Life Technologies #322588)  
598 AURKA (1:500; Bethyl #A300-072A), ACA (1:30; Antibodies Incorporated #15–234),  
599 phosphorylated CDC25B (1:100; Signalway Antibodies #11949),  $\gamma$ -tubulin (1:100;  
600 Sigma-Aldrich #T6557), MAD2 (1:100; Biolegend #PRB452C), MSY2 (1:20,000; gift  
601 from R. Schultz) [64]. TACC3 (1:100; Novus Biologicals # NBP2-67671), REC8 (1:1000,  
602 gift from M. Lampson). Phosphorylated PLK1 (BD Pharmigen #558400); Pericentrin (BD

603 Biosciences, #611814); CEP215 (EMD Millipore #06-1398); CEP192 (Proteintech,  
604 #18832-1-AP). The following secondary antibodies were used at 1:200 for IF  
605 experiments: Anti-human-Alexa-633 (Life Technologies #A21091), anti-mouse-Alexa-  
606 488 (Life Technologies #A11029), anti-rabbit-Alexa-568 (Life Technologies #A10042).

607

## 608 **Microscopy**

609 Images were captured using a Leica SP8 confocal microscope equipped with a 40X,  
610 1.30 N.A. oil immersion objective. For each image, optical z-slices were obtained using  
611 a 1.0  $\mu\text{m}$  step with a zoom setting of 4. For comparison of pixel intensities, the laser  
612 power was kept constant for each oocyte in an experiment.

613 To monitor the extrusion of polar bodies, prophase I-arrested oocytes were matured *in*  
614 *vitro* using an EVOS FL Auto Imaging System (Life Technologies) with a 10X objective.  
615 The microscope stage was heated to 37°C and 5% CO<sub>2</sub> was maintained using the  
616 EVOS Onstage Incubator. Images were acquired every 20 min and processed using  
617 NIH Image J software.

618 For super-resolution microscopy we used two different microscopes: a Leica SP8  
619 confocal microscope with Lightning module equipped with a 63X objective, 1.40 NA oil  
620 immersion objective. For each image, optical z-slices were obtained using a 0.3  $\mu\text{m}$  step  
621 with a zoom setting of 4.5. A Leica SP8 Tau-STED equipped with a 93X objective, 1.3  
622 NA glycerol immersion objective was used to image spindle poles with super resolution.  
623 The system was aligned to control any temporal and temperature dependent shift. For  
624 each image, optical z-slices were obtained using a 0.17  $\mu\text{m}$  step with a zoom setting of

625 4.5. Excitation and depletion lasers were kept constant during image acquisition form  
626 different genotypes.

627 Fluorescence time-lapse image acquisitions were performed using Viventis LS1 Live  
628 light sheet microscope system (Viventis Microscopy Sarl, Switzerland) with a Nikon 25X  
629 NA 1.1 detection objective with 1.5 x zoom. Thirty-one 2- $\mu$ m optical sections were taken  
630 with a 750 x 750-pixel image resolution using 10 min time intervals. EGFP, EYFP,  
631 mCHERRY and SiR fluorescence were excited by 488, 515, 561 and 638 nm laser  
632 lines. EGFP and EYFP emissions were detected using 525/50 (BP) and 539/30 (BP)  
633 filters, respectively. For detection of mCHERRY and SiR fluorescence, 488/561/640  
634 (TBP) filter was used.

### 635 **Histology**

636 Ovaries of the female mice that were in the fertility trials were fixed in Modified  
637 Davidsons fixative solution (Electron Microscopy Sciences, #6413-50) for 6–12 h and  
638 were processed by the Office of Translational Science at Rutgers University for  
639 histology services. Five  $\mu$ m sections of paraffin embedded ovaries were stained with  
640 Harris H/E. Ovarian images were acquired at the 1<sup>st</sup>, 5<sup>th</sup>, and 10<sup>th</sup> sections in each  
641 ovary, under a bright field microscope EVOS FL Auto Imaging System (Life  
642 Technologies) with a 20X objective and images were stitched together to project the  
643 entire ovary. Ovarian follicles were quantified using morphological criteria [65].

644

### 645 **Image analysis of fixed oocytes**

646 Image J software was used to process most of the images (NIH, Bethesda, USA). For  
647 analysis, z-slices for each image were merged into a projection. Bipolar spindle length  
648 was measured between the two furthest points on both spindles using the line tool in  
649 Image J. Spindle volume was determined using the 3D reconstruction tool in Imaris  
650 software (BitPlane) freehand tool to mark precisely around the spindle. For pixel  
651 intensity analyses the average pixel intensity was recorded using the measurement tool.  
652 To define the region of the chromosomes for intensity measurements, the DNA channel  
653 (DAPI) was used as a mask. MTOC markers, including AURKA and  $\gamma$ -tubulin were used  
654 to define spindle poles, and CREST was used as a kinetochore marker for pixel  
655 intensity measurements. Imaris software we used for colocalization analysis of CEP215  
656 and Pericentrin (BitPlane). Briefly, we determined a region of interest around the spindle  
657 pole, we set threshold for each channel and using the colocalization module we  
658 determined: Pearson coefficient which measures the covariance in the signal levels of  
659 two images; and Manders coefficients which are indicators of the proportion of the  
660 signal of one channel with the signal in the other channel over its total intensity [66, 67].

661

### 662 **Image analysis of live oocytes imaged by light-sheet microscopy**

663 All image analysis was done using Fiji software [68]. For analysis of securin-EGFP  
664 degradation of the mean intensity of securin-EGFP was measured on a non-signal  
665 adjusted middle optical stack in every time frame. In every oocyte, measured mean  
666 values from each time point were normalized to the time frame with a maximum mean  
667 intensity. Calculation of destruction rate was described previously [69]. Briefly,

668 destruction rate of securin-EGFP (h-1) was defined as the negative value of the slope of  
669 the line that can be fitted to the decreasing region of securin-EGFP destruction curve.

670

### 671 **Statistical analysis**

672 T-test and one-way analysis of variance (Anova) were used to evaluate the significant  
673 difference among data sets using Prism software (GraphPad Software). The details for  
674 each experiment can be found in the Results section as well as the figure legends.

675 “Experimental n” refers to the number of animals used to repeat each experiment. Data  
676 is shown as the mean  $\pm$  the standard error of the mean (SEM).  $P < 0.05$  was considered  
677 significant. All statistical analysis of data from live light-sheet microscopy was done  
678 using NCSS 11 software (NCSS, LLC; Utah, USA). The type of test used are indicated  
679 in the figure legend.

680

### 681 **Acknowledgements**

682 The authors thank Dr. Philip Jordan for assisting with acquisition of the conditional KO  
683 mice, Ms. Marianne Polunnas for processing the ovarian histology and Dr. Jessica  
684 Shivas for STED imaging acquisition. They acknowledge Drs. Michael Lampson and  
685 Richard Schultz for the REC8 and MSY2 antibodies and members of the Schindler and  
686 Solc labs for helpful discussions. This work was supported by an NIH grant to KS (R01  
687 GM112801), the Inter-Excellence Program award (LTAUSA17097) to PS, and by the  
688 award from National Sustainability Program of the Czech Ministry of Education,  
689 Youth and Sports (LO1609).

690

### 691 **Contribution**

692 KS and PS conceived of the project, analyzed data, wrote and edited the manuscript;

693 CB, PI, MV and DD conducted experiments and analyzed data; CB and PI wrote and

694 edited the manuscript; DD and MV edited the manuscript.

695



696

697 Table 1. Number of pups, oocytes and cells ovulated from WT and *Aurka* KO females

|                                       | WT               |    | KO                |    | p Value |
|---------------------------------------|------------------|----|-------------------|----|---------|
|                                       | Mean $\pm$ SEM   | n  | Mean $\pm$ SEM    | n  |         |
| Avg. # of pups per litter             | 6.25 $\pm$ 0.86  | 3  | 0                 | 3  | 0.0004  |
| Avg. # of prophase I arrested oocytes | 34.38 $\pm$ 5.66 | 13 | 33.92 $\pm$ 6.95  | 13 | 0.9593  |
| Avg. # of ovulated cells              | 23.75 $\pm$ 7.69 | 4  | 18.67 $\pm$ 63.84 | 3  | 0.6211  |

698

699

700 **Figure legends**

701 **Fig. 1 AURKA is deleted from oocytes. (A)** Western blot detecting AURKA from  
702 prophase-I arrested wild-type (WT) and *Aurka* knockout (KO) oocytes (100  
703 oocytes/lane). After stripping the membrane, MSY2 served as loading control. Bands at  
704 ~43kDa were included in the quantifications for AURKA signal. n=4  
705 animals/genotype/experiment. Asterisk = non-specific band **(B)** Quantification of  
706 AURKA after normalizing to MSY2 in (A) (Unpaired Student's t-Test, two-tailed, \*\*  
707  $p < 0.0035$ ) **(C-F)** Localization and activity of AURKA in WT and KO oocytes. **(C)**  
708 Representative confocal images of metaphase I oocytes immunostained with antibodies  
709 against AURKA (gray),  $\alpha$ -Tubulin (green) and DAPI (blue); **(D)** Quantification of AURKA  
710 intensity in (C); Unpaired Student's t-Test, two-tailed, \*\*\*\*  $p < 0.0001$ ; number of oocytes,  
711 WT: 23; KO: 24). **(E)** Representative confocal images of metaphase I oocytes  
712 immunostained with antibodies against phosphorylated CDC25B (gray; pCDC25B),  $\gamma$ -  
713 Tubulin (green) and DAPI (blue). **(F)** Quantification of pCDC25B intensity in (E);  
714 (Unpaired Students t-Test, two-tailed, \*\*\*\*  $p < 0.0001$ ; number of oocytes, WT: 46; KO:  
715 30). Graphs show individual values plus the mean  $\pm$  SEM from 2-3 independent  
716 experiments. Scale bars: 10 $\mu$ m.

717

718 **Fig 2. *Aurka* KO females have normal follicle development**

719 **(A, C, E)** Representative images of hematoxylin/eosin-stained ovarian sections from WT  
720 and *Aurka* knockout (KO) females from different ages: 1 month **(A)**; 2 months **(C)**; 6  
721 months **(E)**, red asterisk: corpus luteum (CL). The zoom panels highlight commonly  
722 observed follicles at each age. **(B, D, F)** Quantification of follicle types from the ovaries

723 represented in (A, C, E) respectively. Follicle numbers were quantified for each ovary  
724 and reported as the average number of each type of follicles per section. \*  $p < 0.05$ .  
725 Graph shows the mean  $\pm$  SEM (1 and 6 months: 3 females/genotype, 2 months: 2 WT;  
726 3 A KO). Scale bars: 50 $\mu$ m (zoom panels) and 200 $\mu$ m.

727

### 728 **Fig 3. AURKA is specifically required in oocytes to complete meiosis I**

729 **(A)** Representative confocal images of the oocytes and eggs retrieved from oviducts of  
730 WT and *Aurka* KO females or oocytes matured *in vitro*. Cells were immunostained with  
731 antibodies against  $\alpha$ -Tubulin (green) and DAPI (gray); **(B)** Quantification of percentage  
732 (%) of cells ovulated at Metaphase II (Met II); (Unpaired Students t-Test, two-tailed, \*\*\*\*  
733  $p < 0.0001$ ). **(C)** Quantification of the % of oocytes that undergo polar body extrusion  
734 (PBE) *in vitro* (Unpaired Students t-Test, two-tailed, \*\*\*\*  $p < 0.0001$ ). **(D)** Quantification of  
735 the % of oocytes that undergo nuclear envelope breakdown (NEBD) *in vitro* (Unpaired  
736 Students t-Test, two-tailed,  $p = 0.6707$ ). Graphs show the mean  $\pm$  SEM from 3  
737 independent experiments (3 females/genotype). Scale bars: 10 $\mu$ m. **(E)** Live light-sheet  
738 imaging of WT and KO oocytes expressing histone H2B-mCHERRY (magenta) and  
739 stained with SiR-tubulin (green). Some KO oocytes also expressed exogenous AURKA-  
740 EGFP, AURKB-EGFP or AURKC-EYFP (gray). Maximum intensity z-projections and  
741 selected time points are shown. Scale bars: 10  $\mu$ m. **(F)** Data in (E) was used to quantify  
742 % of oocytes extruding polar body. n (WT, KO, KO + *Aurka*, KO + *Aurkb*, KO + *Aurkc*) =  
743 10, 10, 13, 15, 11, respectively.

744

### 745 **Fig 4. *Aurka* KO oocytes have defects in spindle building**

746 **(A)** Representative confocal images of oocytes from WT and *Aurka* KO females  
747 matured to different stages of meiosis, as indicated, and immunostained with antibodies  
748 against  $\gamma$ -Tubulin (gray),  $\alpha$ -Tubulin (green) and DAPI (magenta). **(B)** Quantification of  
749 the percentage (%) of oocytes with resolved chromosomes at different meiotic stages  
750 (Unpaired Students t-Test, two-tailed, \*\*\*\*  $p < 0.0001$ ; \* 0.0196, 6 experimental  
751 replicates). **(C)** Quantification of the % of oocytes with a monopolar or bipolar spindle  
752 (Two-way ANOVA; \*\*\*\*  $p < 0.0001$ , 19 females/genotype). **(D)** Quantification of spindle  
753 lengths of bipolar spindles (Unpaired Students t-Test, two-tailed, \*\*\*\*  $p < 0.0001$ ; number  
754 of oocytes, WT: 119; KO: 104). **(E)** Quantification of spindle volume (Unpaired Students  
755 t-Test, two-tailed, \*\*\*\*  $p < 0.0001$ ; number of oocytes, WT: 113; KO: 143). **(F-G)** image  
756 data from Fig. 3E was used for quantification. n (WT, KO, KO + *Aurka*, KO + *Aurkb*, KO  
757 + *Aurkc*) = 10, 10, 13, 15, 11, respectively. **(F)** Spindle volume during meiotic  
758 maturation. Time is relative to NEBD. **(G)** Time for chromosome individualization and  
759 **(H)** spindle bipolarization (Mann-Whitney test, \*  $p < 0.05$ , \*\*  $p < 0.01$ , \*\*\*  $p < 0.001$ , \*\*\*\*  
760  $p < 0.0001$ ). **(I)** % of oocytes that had bipolar spindle in Met I (Fisher Exact test, \*\*\*  
761  $p < 0.001$ , \*\*\*\*  $p < 0.0001$ ).

762

### 763 **Fig 5. *Aurka* KO oocytes fail to fragment MTOCs and form LISD**

764 **(A)** Representative images of maximum intensity z-projections from WT and *Aurka* KO  
765 oocytes matured live using light-sheet microscopy. Oocytes expressed CDK5RAP2-  
766 EGFP (MTOCs, gray) and H2B-mCherry (DNA, magenta) while incubated with SiR-  
767 tubulin (spindle, green) are shown. Time points are relative to time after nuclear  
768 envelope breakdown (h:min). **(B)** Representative confocal images of oocytes from WT

769 and KO females in early pro-Metaphase I immunostained with antibodies against  
770 phosphorylated PLK1 (pPLK1, gray), CEP192 (red) and DAPI (blue). **(C)** Quantification  
771 of pPLK1 intensity at MTOCs (Unpaired Students t-Test, two-tailed, \*\*\*\*  $p < 0.0001$ ;  
772 number of oocytes, WT: 31; KO: 33). **(D)** Representative images of Metaphase I  
773 oocytes from WT and KO females visualized with super-resolution microscopy (using  
774 Lightning settings) and immunostained with antibodies against Pericentrin (PCTN,  
775 green), CEP215 (gray) and DAPI (magenta). Scale bars: 10 $\mu$ m and 2  $\mu$ m. **(E)**  
776 Quantification of spindle pole width in D (Unpaired Students t-Test, two-tailed, \*\*\*\*  
777  $p < 0.0001$ ; number of oocytes, WT: 15; KO: 20). **(F)** Quantification of spindle pole  
778 volume in D (Unpaired Students t-Test, two-tailed, \*\*  $p = 0.0051$ ; number of oocytes, WT:  
779 16; KO: 21). **(G)** Representative images from STED microscopy of spindle poles of WT  
780 and KO oocytes at Metaphase I immunostained with antibodies against Pericentrin  
781 (PCTN, green), CEP215 (magenta); colocalization specific pixels (gray). **(H)**  
782 Quantification of Pearson coefficient. **(I, J)** Quantification of Manders coefficient for  
783 Pericentrin (Unpaired Students t-Test, two-tailed,  $p = 0.2736$ ; number of oocytes, WT: 17  
784 A KO: 21) and CEP215 (Unpaired Students t-Test, two-tailed,  $p = 0.129$ ; number of  
785 oocytes, WT: 15; KO: 18 respectively. Scale bars: 3  $\mu$ m. **(K)** Representative confocal  
786 images of oocytes from WT and KO females at Metaphase I immunostained with  
787 antibodies against TACC3 (magenta), PCTN (green) and DAPI (blue). Scale bars: 10 $\mu$ m  
788 and 2 $\mu$ m. **(L)** Quantification of TACC3 intensity (Unpaired Students t-Test, two-tailed,  
789 \*\*\*\*  $p < 0.0001$ ; number of oocytes, WT: 45; KO: 49).

790

791 **Fig 6. Aurka KO oocyte arrest is SAC independent.**

792 **(A)** Representative confocal images of oocytes from WT and *Aurka* KO females at  
793 Metaphase I immunostained with antibodies to detect centromeres (anti-centromeric  
794 antigen (ACA) (magenta)), MAD2 (gray) and chromosomes (DAPI (blue)). **(B)**  
795 Quantification of MAD2 intensity at kinetochores in (A) (Unpaired Students t-Test, two-  
796 tailed, \*\*\*\*  $p < 0.0001$ ; number of oocytes, WT: 37, A KO: 47). Scale bars: 10  $\mu\text{m}$ . **(C)** Live  
797 light-sheet imaging of oocytes expressing securin-EGFP (grey), H2B-mCherry  
798 (magenta, chromosomes) and stained with SiR-tubulin (green, microtubules) +/- 1  $\mu\text{M}$   
799 reversine treatment. Maximum intensity z-projection images are shown. Time relative to  
800 NEBD. Scale bar = 10  $\mu\text{m}$ . **(D-G)** Data from (C) was used for analysis. Number of  
801 oocytes, WT: 18, KO: 24, WT + reversine: 9, KO + reversine: 11. **(D)** Normalized  
802 intensities of cytoplasmic securin-EGFP signals. For normalization, maximum securin-  
803 EGFP signal in each oocyte was set to 1. Average +/- SD are shown. **(E)** Rate of  
804 securin-EGFP destruction ( $\text{h}^{-1}$ ) (Mann Whitney Test, \*\*  $p < 0.001$ , \*\*\*\*  $p < 0.0001$ ). **(E)**  
805 Proportion of WT and KO oocytes +/- 1  $\mu\text{M}$  reversine that reached different phases of  
806 meiosis (Met I – metaphase I, Met II – metaphase II, PB error – polar body extrusion  
807 retraction) after 16 h of time-lapse imaging (Likelihood Test, \*\*\*  $p < 0.001$ , \*\*\*\*  $p < 0.0001$ ).  
808 **(G)** Anaphase I onset (hours relative to NEBD), which was defined as the first time point  
809 when segregation of chromosomes was detected (Mann Whitney Test, \*\*\*\*  $p < 0.0001$ ).  
810 **(H)** Representative confocal images of chromosome spreads. Oocytes were matured  
811 with reversine (1  $\mu\text{M}$ ) for 16 h, immunostained with antibodies to detect centromeres  
812 (anti-centromeric antigen (ACA) (green), REC8 (gray) and chromosomes (DAPI (blue)).  
813 To assess persistent REC8, these oocytes were compared to DMSO-treated KO  
814 oocytes. **(I)** Quantification of REC8 intensity in (F) (Unpaired Students t-Test, two-tailed,

815 \*\*\*\*  $p < 0.0001$ ; number of oocytes, KO DMSO: 32 KO reversine: 20). Graphs show the  
816 mean  $\pm$  SEM from at least 3 independent experiments. Scale bars: 10 $\mu$ m and 2 $\mu$ m.

817

818 **Fig 7. Schematic comparing WT and Aurka KO MI events.** In *Aurka* KO oocytes,  
819 AURKC still localizes to MTOCs but PLK1 is not phosphorylated and MTOCs fail to  
820 fragment. TACC3 does not participate in building the liquid-like spindle domain (LISD).  
821 Some spindles are monopolar, but other spindles can become bipolar, but they are  
822 short. The result is an MI arrest and a failure to cleave cohesin. In WT oocytes, AURKA  
823 and AURKC localize to MTOCs, but likely in distinct regions. AURKA is required to  
824 phosphorylate PLK1 to initiate MTOC fragmentation and likely phosphorylates TACC3  
825 to regulate LISD building. Prior to anaphase I onset, AURKA regulates cohesin  
826 cleavage in an APC/C independent manner.

827

828

## 829 **Supplementary figure legends**

### 830 **Figure S1. AURKC localizes to MTOCs**

831 Live light-sheet imaging of KO oocytes expressing histone H2B-mCHERRY (magenta),  
832 AURKC-EYFP (gray) and stained with SiR-tubulin (green). The arrows point to AURKC  
833 localization. Maximum intensity z-projections at Metaphase I. Scale bars: 10  $\mu$ m.

834

### 835 **Figure S2. Inhibition of AURKA causes spindle defects**

836 **(A)** Representative confocal images of oocytes at Metaphase I matured with MLN8237  
837 (MLN) and immunostained with antibodies against  $\alpha$ -Tubulin (green) and DAPI (gray).

838 **(B)** Quantification of the percentage (%) of oocytes with different spindle phenotypes  
839 (Unpaired Students t-Test, two-tailed, \* p=0.014). **(C)** Quantification of the bipolar  
840 spindle area (Unpaired Students t-Test, two-tailed, \*\*\*\* p<0.0001; number of oocytes,  
841 WT: 31; KO: 23). **(D)** Quantification of the bipolar spindle length (Unpaired Students t-  
842 Test, two-tailed, \*\*\*\* p<0.0001; number of oocytes, WT: 30; KO: 22). Graphs show the  
843 mean  $\pm$  SEM from at least 3 independent experiments.

844

845 **Figure S3. *Aurka* KO oocytes have normal number of MTOCs at prophase I.**

846 Representative confocal images of WT and *Aurka* KO prophase I-arrested oocytes  
847 immunostained with  $\gamma$ -Tubulin (magenta),  $\alpha$ -Tubulin (green), DAPI (blue). Scale bar:  
848 20 $\mu$ m.

849

850 **Figure S4. Comparison of securin destruction in *Aurka* KO oocytes treated with**

851 **reversine. (A)** Live light-sheet imaging of KO oocytes expressing securin-EGFP (grey),  
852 H2B-mCherry (magenta, chromosomes) and stained with SiR-tubulin (green,  
853 microtubules) treated with 1 $\mu$ M reversine. Maximum intensity z-projection images of KO  
854 oocyte arrested at MI (KO MI), KO oocyte entering Anaphase I and extruding of polar  
855 body (KO MII), and KO oocyte entering Anaphase I but having a polar body emission  
856 error (KO PB error). Time relative to NEBD. Scale bar = 10  $\mu$ m. **(B)** Normalized  
857 intensities of cytoplasmic securin-EGFP signals. WT, KO and KO + Reversine MI  
858 groups are same as in Fig. 6D. KO + Reversine and KO + Reversine PB error are split  
859 from KO + Reversine group in Fig. 6D.

860



861 **Supplemental Movie legends:**

862 **Movie S1:** Movie corresponding to oocytes presented Fig. 3E.

863 **Movie S2:** Movie corresponding to oocytes presented Fig. 5A.

864 **Movies S3:** Movie corresponding to oocytes presented Fig. 6C.

865 **Movies S4:** Movie corresponding to oocytes presented Fig. S4A

866

867

868 **REFERENCES**

- 869 1. Nagaoka SI, Hassold TJ, Hunt PA. Human aneuploidy: mechanisms and new  
870 insights into an age-old problem. *Nat Rev Genet.* 2012;13(7):493-504.
- 871 2. Hassold T, Hunt P. To err (meiotically) is human: the genesis of human  
872 aneuploidy. *Nature Reviews Genetics.* 2001;2(4):280-91.
- 873 3. Gruhn JR, Zielinska AP, Shukla V, Blanshard R, Capalbo A, Cimadomo D, et al.  
874 Chromosome errors in human eggs shape natural fertility over reproductive life span.  
875 *Science.* 2019;365(6460):1466-9.
- 876 4. Manandhar G, Schatten H, Sutovsky P. Centrosome reduction during  
877 gametogenesis and its significance. *Biol Reprod.* 2005;72(1):2-13.
- 878 5. Combelles CM, Albertini DF. Microtubule patterning during meiotic maturation in  
879 mouse oocytes is determined by cell cycle-specific sorting and redistribution of gamma-  
880 tubulin. *Dev Biol.* 2001;239(2):281-94.
- 881 6. Ma W, Viveiros MM. Depletion of pericentrin in mouse oocytes disrupts  
882 microtubule organizing center function and meiotic spindle organization. *Mol Reprod*  
883 *Dev.* 2014;81(11):1019-29.
- 884 7. Baumann C, Wang X, Yang L, Viveiros MM. Error-prone meiotic division and  
885 subfertility in mice with oocyte-conditional knockdown of pericentrin. *J Cell Sci.*  
886 2017;130(7):1251-62.
- 887 8. So C, Seres KB, Steyer AM, Monnich E, Clift D, Pejkovska A, et al. A liquid-like  
888 spindle domain promotes acentrosomal spindle assembly in mammalian oocytes.  
889 *Science.* 2019;364(6447).
- 890 9. Schuh M, Ellenberg J. Self-organization of MTOCs replaces centrosome function  
891 during acentrosomal spindle assembly in live mouse oocytes. *Cell.* 2007;130(3):484-98.
- 892 10. Clift D, Schuh M. A three-step MTOC fragmentation mechanism facilitates bipolar  
893 spindle assembly in mouse oocytes. *Nat Commun.* 2015;6:7217.
- 894 11. Musacchio A, Salmon ED. The spindle-assembly checkpoint in space and time.  
895 *Nat Rev Mol Cell Biol.* 2007;8(5):379-93.
- 896 12. Carmena M, Earnshaw WC. The cellular geography of Aurora kinases. *Nature*  
897 *Reviews Molecular Cell Biology.* 2003;4(11):842-54.
- 898 13. Nigg EA. Mitotic kinases as regulators of cell division and its checkpoints. *Nature*  
899 *Reviews Molecular Cell Biology.* 2001;2(1):21-32.
- 900 14. Brown JR, Koretke KK, Birkeland ML, Sanseau P, Patrick DR. Evolutionary  
901 relationships of Aurora kinases: implications for model organism studies and the  
902 development of anti-cancer drugs. *BMC Evol Biol.* 2004;4:39.
- 903 15. Barr AR, Gergely F. Aurora-A: the maker and breaker of spindle poles. *J Cell Sci.*  
904 2007;120(Pt 17):2987-96.
- 905 16. Cowley DO, Rivera-Perez JA, Schliekelman M, He YJ, Oliver TG, Lu L, et al.  
906 Aurora-A kinase is essential for bipolar spindle formation and early development. *Mol*  
907 *Cell Biol.* 2009;29(4):1059-71.
- 908 17. Mori D, Yano Y, Toyo-oka K, Yoshida N, Yamada M, Muramatsu M, et al. NDEL1  
909 phosphorylation by Aurora-A kinase is essential for centrosomal maturation, separation,  
910 and TACC3 recruitment. *Mol Cell Biol.* 2007;27(1):352-67.

- 911 18. Katayama H, Sasai K, Kloc M, Brinkley BR, Sen S. Aurora kinase-A regulates  
912 kinetochore/chromatin associated microtubule assembly in human cells. *Cell Cycle*.  
913 2008;7(17):2691-704.
- 914 19. Kinoshita K, Noetzel TL, Pelletier L, Mechtler K, Drechsel DN, Schwager A, et al.  
915 Aurora A phosphorylation of TACC3/maskin is required for centrosome-dependent  
916 microtubule assembly in mitosis. *J Cell Biol*. 2005;170(7):1047-55.
- 917 20. Balboula AZ, Nguyen AL, Gentilello AS, Quartuccio SM, Drutovic D, Solc P, et al.  
918 Haspin kinase regulates microtubule-organizing center clustering and stability through  
919 Aurora kinase C in mouse oocytes. *J Cell Sci*. 2016;129(19):3648-60.
- 920 21. Saskova A, Solc P, Baran V, Kubelka M, Schultz RM, Motlik J. Aurora kinase A  
921 controls meiosis I progression in mouse oocytes. *Cell Cycle*. 2008;7(15):2368-76.
- 922 22. Solc P, Baran V, Mayer A, Bohmova T, Panenkova-Havlova G, Saskova A, et al.  
923 Aurora kinase A drives MTOC biogenesis but does not trigger resumption of meiosis in  
924 mouse oocytes matured in vivo. *Biol Reprod*. 2012;87(4):85.
- 925 23. Yao LJ, Zhong ZS, Zhang LS, Chen DY, Schatten H, Sun QY. Aurora-A is a  
926 critical regulator of microtubule assembly and nuclear activity in mouse oocytes,  
927 fertilized eggs, and early embryos. *Biol Reprod*. 2004;70(5):1392-9.
- 928 24. Ding J, Swain JE, Smith GD. Aurora kinase-A regulates microtubule organizing  
929 center (MTOC) localization, chromosome dynamics, and histone-H3 phosphorylation in  
930 mouse oocytes. *Mol Reprod Dev*. 2011;78(2):80-90.
- 931 25. Bury L, Coelho PA, Simeone A, Ferries S, Eysers CE, Eysers PA, et al. Plk4 and  
932 Aurora A cooperate in the initiation of acentriolar spindle assembly in mammalian  
933 oocytes. *J Cell Biol*. 2017;216(11):3571-90.
- 934 26. Wang X, Baumann C, De La Fuente R, Viveiros MM. CEP215 and AURKA  
935 regulate spindle pole focusing and aMTOC organization in mouse oocytes.  
936 *Reproduction*. 2020.
- 937 27. Balboula AZ, Schindler K. Selective disruption of aurora C kinase reveals distinct  
938 functions from aurora B kinase during meiosis in mouse oocytes. *PLoS Genet*.  
939 2014;10(2):e1004194.
- 940 28. Schindler K, Davydenko O, Fram B, Lampson MA, Schultz RM. Maternally  
941 recruited Aurora C kinase is more stable than Aurora B to support mouse oocyte  
942 maturation and early development. *Proc Natl Acad Sci U S A*. 2012;109(33):E2215-22.
- 943 29. Nguyen AL, Drutovic D, Vazquez BN, El Yakoubi W, Gentilello AS, Malumbres  
944 M, et al. Genetic Interactions between the Aurora Kinases Reveal New Requirements  
945 for AURKB and AURKC during Oocyte Meiosis. *Current Biology*. 2018;28(21):3458-+.
- 946 30. Wellard SR, Schindler K, Jordan PW. Aurora B and C kinases regulate  
947 chromosome desynapsis and segregation during mouse and human spermatogenesis.  
948 *Journal of Cell Science*. 2020;133(23):jcs248831.
- 949 31. Lan ZJ, Xu X, Cooney AJ. Differential oocyte-specific expression of Cre  
950 recombinase activity in GDF-9-iCre, Zp3cre, and Msx2Cre transgenic mice. *Biol*  
951 *Reprod*. 2004;71(5):1469-74.
- 952 32. Chmatal L, Yang K, Schultz RM, Lampson MA. Spatial Regulation of Kinetochore  
953 Microtubule Attachments by Destabilization at Spindle Poles in Meiosis I. *Curr Biol*.  
954 2015;25(14):1835-41.

- 955 33. Zhao X, Feng C, Yu D, Deng X, Wu D, Jin M, et al. Successive recruitment of p-  
956 CDC25B-Ser351 and p-cyclin B1-Ser123 to centrosomes contributes to the release of  
957 mouse oocytes from prophase I arrest. *Dev Dyn*. 2015;244(2):110-21.
- 958 34. Kettenbach AN, Schweppe DK, Faherty BK, Pechenick D, Pletnev AA, Gerber  
959 SA. Quantitative Phosphoproteomics Identifies Substrates and Functional Modules of  
960 Aurora and Polo-Like Kinase Activities in Mitotic Cells. *Science Signaling*.  
961 2011;4(179):rs5-rs.
- 962 35. Little TM, Jordan PW. PLK1 is required for chromosome compaction and  
963 microtubule organization in mouse oocytes. *Mol Biol Cell*. 2020;31(12):1206-17.
- 964 36. Macůrek L, Lindqvist A, Lim D, Lampson MA, Klompaker R, Freire R, et al.  
965 Polo-like kinase-1 is activated by aurora A to promote checkpoint recovery. *Nature*.  
966 2008;455(7209):119-23.
- 967 37. Barros TP, Kinoshita K, Hyman AA, Raff JW. Aurora A activates D-TACC-Msps  
968 complexes exclusively at centrosomes to stabilize centrosomal microtubules. *J Cell Biol*.  
969 2005;170(7):1039-46.
- 970 38. Vallot A, Leontiou I, Cladiere D, El Yakoubi W, Bolte S, Buffin E, et al. Tension-  
971 Induced Error Correction and Not Kinetochore Attachment Status Activates the SAC in  
972 an Aurora-B/C-Dependent Manner in Oocytes. *Curr Biol*. 2018;28(1):130-9 e3.
- 973 39. Hached K, Xie SZ, Buffin E, Cladière D, Rachez C, Sacras M, et al. Mps1 at  
974 kinetochores is essential for female mouse meiosis I. *Development*. 2011;138(11):2261-  
975 71.
- 976 40. Santaguida S, Tighe A, D'Alise AM, Taylor SS, Musacchio A. Dissecting the role  
977 of MPS1 in chromosome biorientation and the spindle checkpoint through the small  
978 molecule inhibitor reversine. *J Cell Biol*. 2010;190(1):73-87.
- 979 41. Wike CL, Graves HK, Hawkins R, Gibson MD, Ferdinand MB, Zhang T, et al.  
980 Aurora-A mediated histone H3 phosphorylation of threonine 118 controls condensin I  
981 and cohesin occupancy in mitosis. *eLife*. 2016;5:e11402.
- 982 42. Eysers PA, Erikson E, Chen LG, Maller JL. A Novel Mechanism for Activation of  
983 the Protein Kinase Aurora A. *Current Biology*. 2003;13(8):691-7.
- 984 43. Tsai MY, Wiese C, Cao K, Martin O, Donovan P, Ruderman J, et al. A Ran  
985 signalling pathway mediated by the mitotic kinase Aurora A in spindle assembly. *Nat*  
986 *Cell Biol*. 2003;5(3):242-8.
- 987 44. Brunet S, Dumont J, Lee KW, Kinoshita K, Hikal P, Gruss OJ, et al. Meiotic  
988 regulation of TPX2 protein levels governs cell cycle progression in mouse oocytes.  
989 *PLoS One*. 2008;3(10):e3338.
- 990 45. Carmena M, Wheelock M, Funabiki H, Earnshaw WC. The chromosomal  
991 passenger complex (CPC): from easy rider to the godfather of mitosis. *Nat Rev Mol Cell*  
992 *Biol*. 2012;13(12):789-803.
- 993 46. Carmena M, Ruchaud S, Earnshaw WC. Making the Auroras glow: regulation of  
994 Aurora A and B kinase function by interacting proteins. *Curr Opin Cell Biol*.  
995 2009;21(6):796-805.
- 996 47. Fu J, Bian M, Liu J, Jiang Q, Zhang C. A single amino acid change converts  
997 Aurora-A into Aurora-B-like kinase in terms of partner specificity and cellular function.  
998 *Proceedings of the National Academy of Sciences*. 2009;106(17):6939-44.

- 999 48. Hans F, Skoufias DA, Dimitrov S, Margolis RL. Molecular distinctions between  
1000 Aurora A and B: a single residue change transforms Aurora A into correctly localized  
1001 and functional Aurora B. *Mol Biol Cell*. 2009;20(15):3491-502.
- 1002 49. Zorba A, Buosi V, Kutter S, Kern N, Pontiggia F, Cho YJ, et al. Molecular  
1003 mechanism of Aurora A kinase autophosphorylation and its allosteric activation by  
1004 TPX2. *Elife*. 2014;3:e02667.
- 1005 50. Ferrari S, Marin O, Pagano MA, Meggio F, Hess D, El-Shemerly M, et al. Aurora-  
1006 A site specificity: a study with synthetic peptide substrates. *Biochem J*. 2005;390(Pt  
1007 1):293-302.
- 1008 51. van Heesbeen R, Raaijmakers JA, Tanenbaum ME, Halim VA, Lelieveld D,  
1009 Lieftink C, et al. Aurora A, MCAK, and Kif18b promote Eg5-independent spindle  
1010 formation. *Chromosoma*. 2017;126(4):473-86.
- 1011 52. Ye AA, Deretic J, Hoel CM, Hinman AW, Cimini D, Welburn JP, et al. Aurora A  
1012 Kinase Contributes to a Pole-Based Error Correction Pathway. *Curr Biol*.  
1013 2015;25(14):1842-51.
- 1014 53. Seki A, Coppinger JA, Jang C-Y, Yates JR, Fang G. Bora and the Kinase Aurora  
1015 A Cooperatively Activate the Kinase Plk1 and Control Mitotic Entry. *Science*.  
1016 2008;320(5883):1655-8.
- 1017 54. Macurek L, Lindqvist A, Lim D, Lampson MA, Klompaker R, Freire R, et al.  
1018 Polo-like kinase-1 is activated by aurora A to promote checkpoint recovery. *Nature*.  
1019 2008;455(7209):119-23.
- 1020 55. Asteriti IA, De Mattia F, Guarguaglini G. Cross-Talk between AURKA and Plk1 in  
1021 Mitotic Entry and Spindle Assembly. *Frontiers in Oncology*. 2015;5(283).
- 1022 56. Joukov V, De Nicolo A. Aurora-PLK1 cascades as key signaling modules in the  
1023 regulation of mitosis. *Science Signaling*. 2018;11(543):eaar4195.
- 1024 57. Giet R, Uzbekov R, Cubizolles F, Le Guellec K, Prigent C. The *Xenopus laevis*  
1025 aurora-related protein kinase pEg2 associates with and phosphorylates the kinesin-  
1026 related protein XIEg5. *J Biol Chem*. 1999;274(21):15005-13.
- 1027 58. Fu J, Bian M, Xin G, Deng Z, Luo J, Guo X, et al. TPX2 phosphorylation  
1028 maintains metaphase spindle length by regulating microtubule flux. *J Cell Biol*.  
1029 2015;210(3):373-83.
- 1030 59. Mendez R, Hake LE, Andresson T, Littlepage LE, Ruderman JV, Richter JD.  
1031 Phosphorylation of CPE binding factor by Eg2 regulates translation of c-mos mRNA.  
1032 *Nature*. 2000;404(6775):302-7.
- 1033 60. Hodgman R, Tay J, Mendez R, Richter JD. CPEB phosphorylation and  
1034 cytoplasmic polyadenylation are catalyzed by the kinase IAK1/Eg2 in maturing mouse  
1035 oocytes. *Development*. 2001;128(14):2815-22.
- 1036 61. Chatot CL, Ziomek CA, Bavister BD, Lewis JL, Torres I. An improved culture  
1037 medium supports development of random-bred 1-cell mouse embryos in vitro. *J Reprod*  
1038 *Fertil*. 1989;86(2):679-88.
- 1039 62. McGuinness BE, Anger M, Kouznetsova A, Gil-Bernabé AM, Helmhart W, Kudo  
1040 NR, et al. Regulation of APC/C activity in oocytes by a Bub1-dependent spindle  
1041 assembly checkpoint. *Curr Biol*. 2009;19(5):369-80.
- 1042 63. Chambon JP, Hached K, Wassmann K. Chromosome spreads with centromere  
1043 staining in mouse oocytes. *Methods Mol Biol*. 2013;957:203-12.

- 1044 64. Yu J, Hecht NB, Schultz RM. RNA-binding properties and translation repression  
1045 in vitro by germ cell-specific MSY2 protein. *Biol Reprod*. 2002;67(4):1093-8.
- 1046 65. Bristol-Gould SK, Kreeger PK, Selkirk CG, Kilen SM, Cook RW, Kipp JL, et al.  
1047 Postnatal regulation of germ cells by activin: The establishment of the initial follicle pool.  
1048 *Developmental Biology*. 2006;298(1):132-48.
- 1049 66. Dunn KW, Kamocka MM, McDonald JH. A practical guide to evaluating  
1050 colocalization in biological microscopy. *Am J Physiol Cell Physiol*. 2011;300(4):C723-  
1051 42.
- 1052 67. Bolte S, Cordelières FP. A guided tour into subcellular colocalization analysis in  
1053 light microscopy. *J Microsc*. 2006;224(Pt 3):213-32.
- 1054 68. Schindelin J, Arganda-Carreras I, Frise E, Kaynig V, Longair M, Pietzsch T, et al.  
1055 Fiji: an open-source platform for biological-image analysis. *Nat Methods*. 2012;9(7):676-  
1056 82.
- 1057 69. Solc P, Kitajima TS, Yoshida S, Brzakova A, Kaido M, Baran V, et al. Multiple  
1058 Requirements of PLK1 during Mouse Oocyte Maturation. *PLOS ONE*.  
1059 2015;10(2):e0116783.
- 1060  
1061

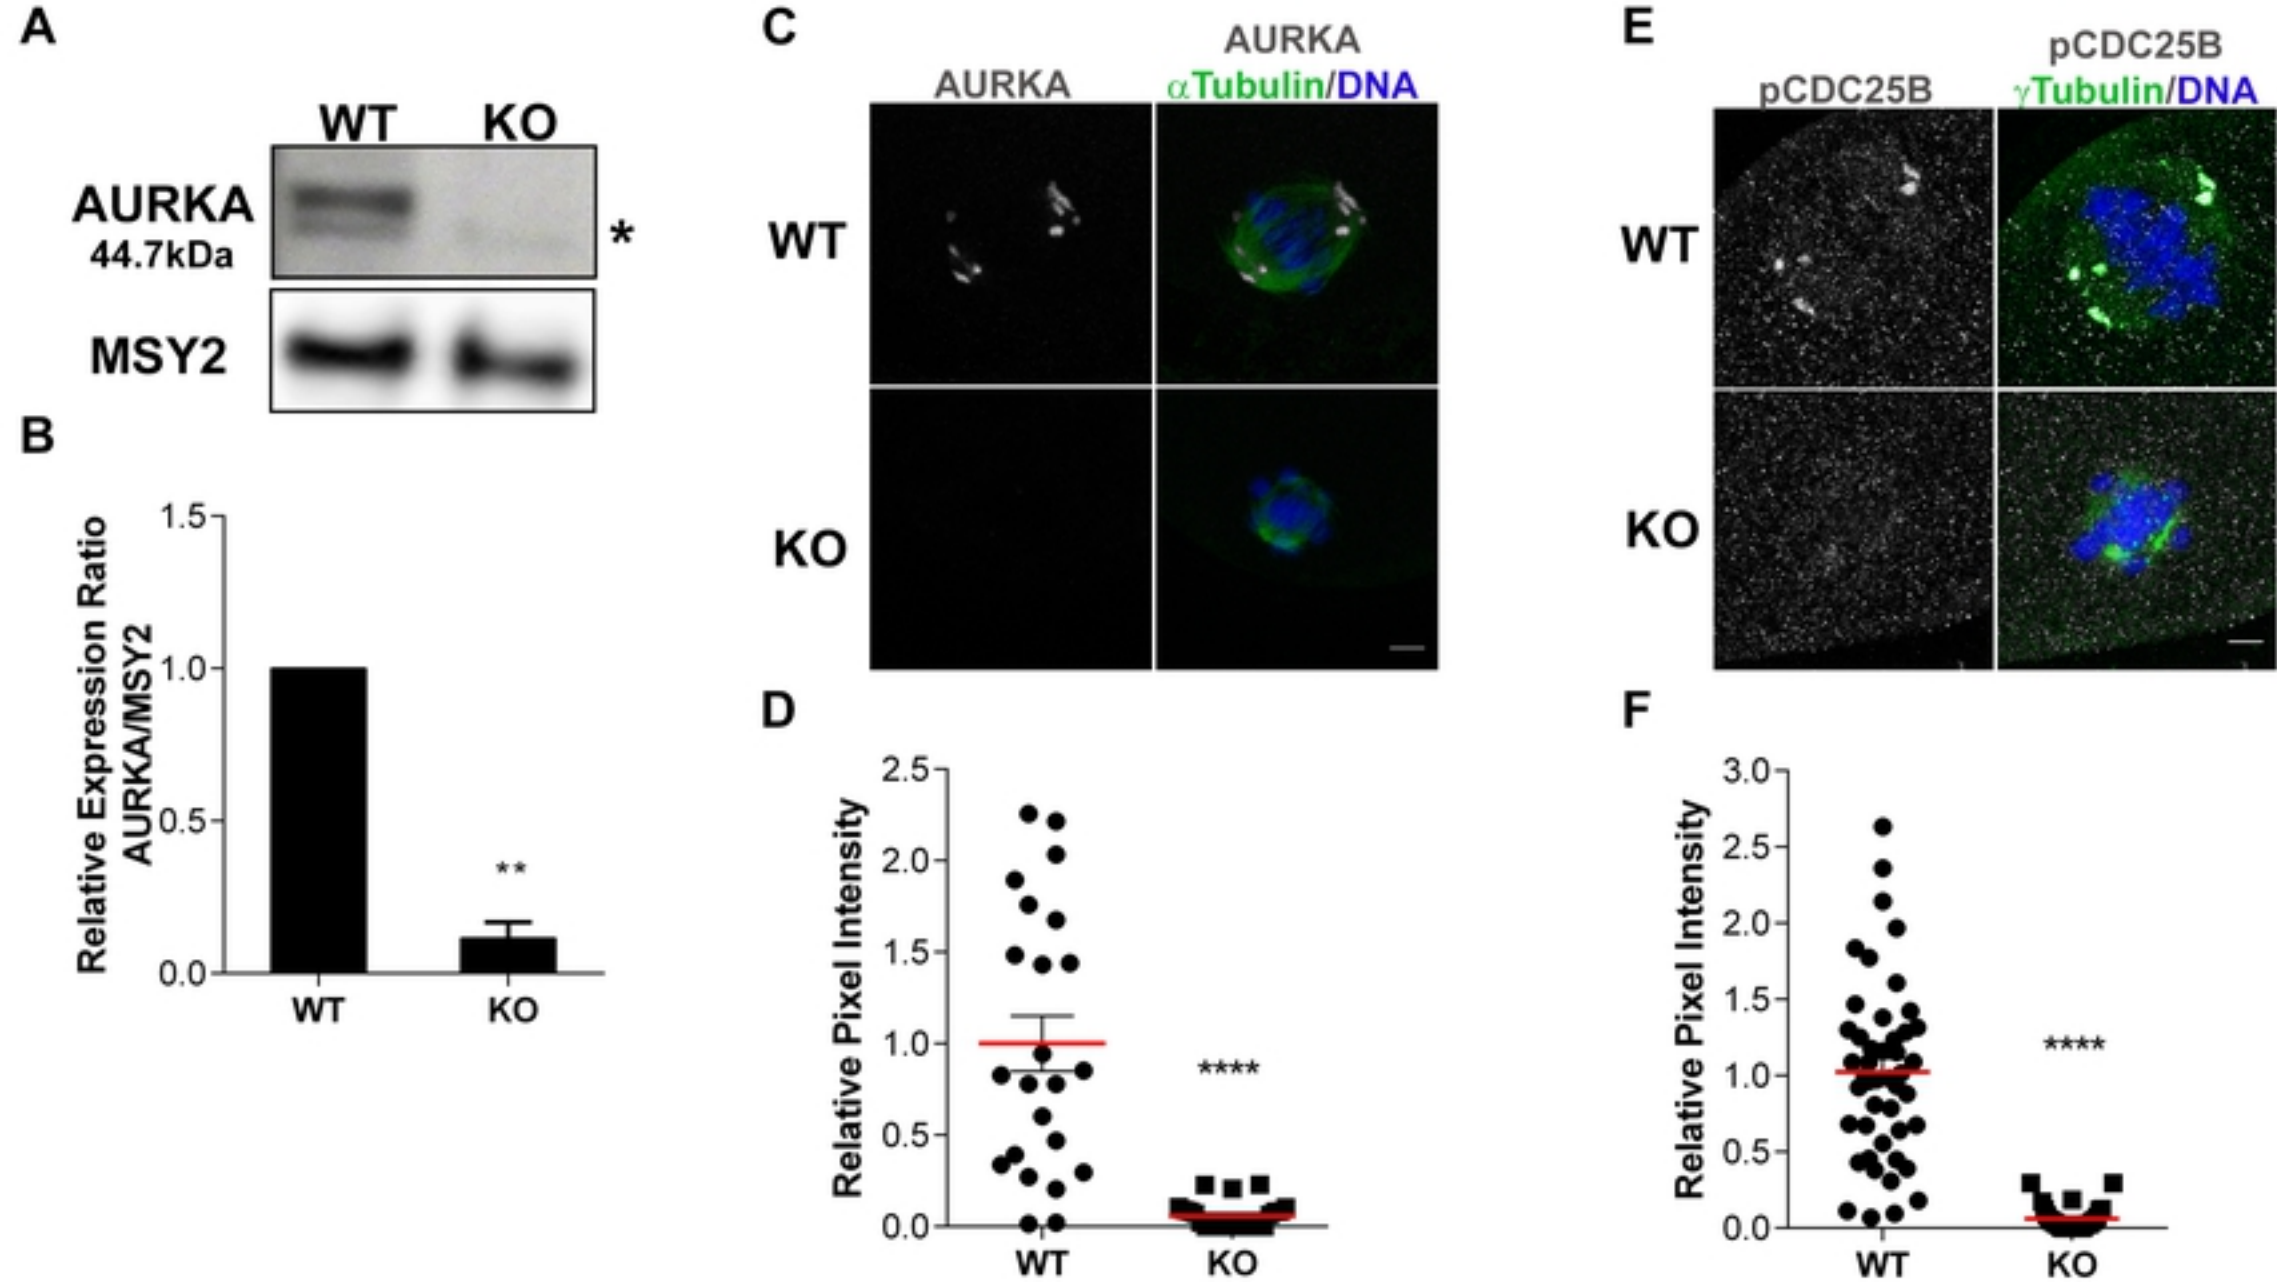

Figure 1

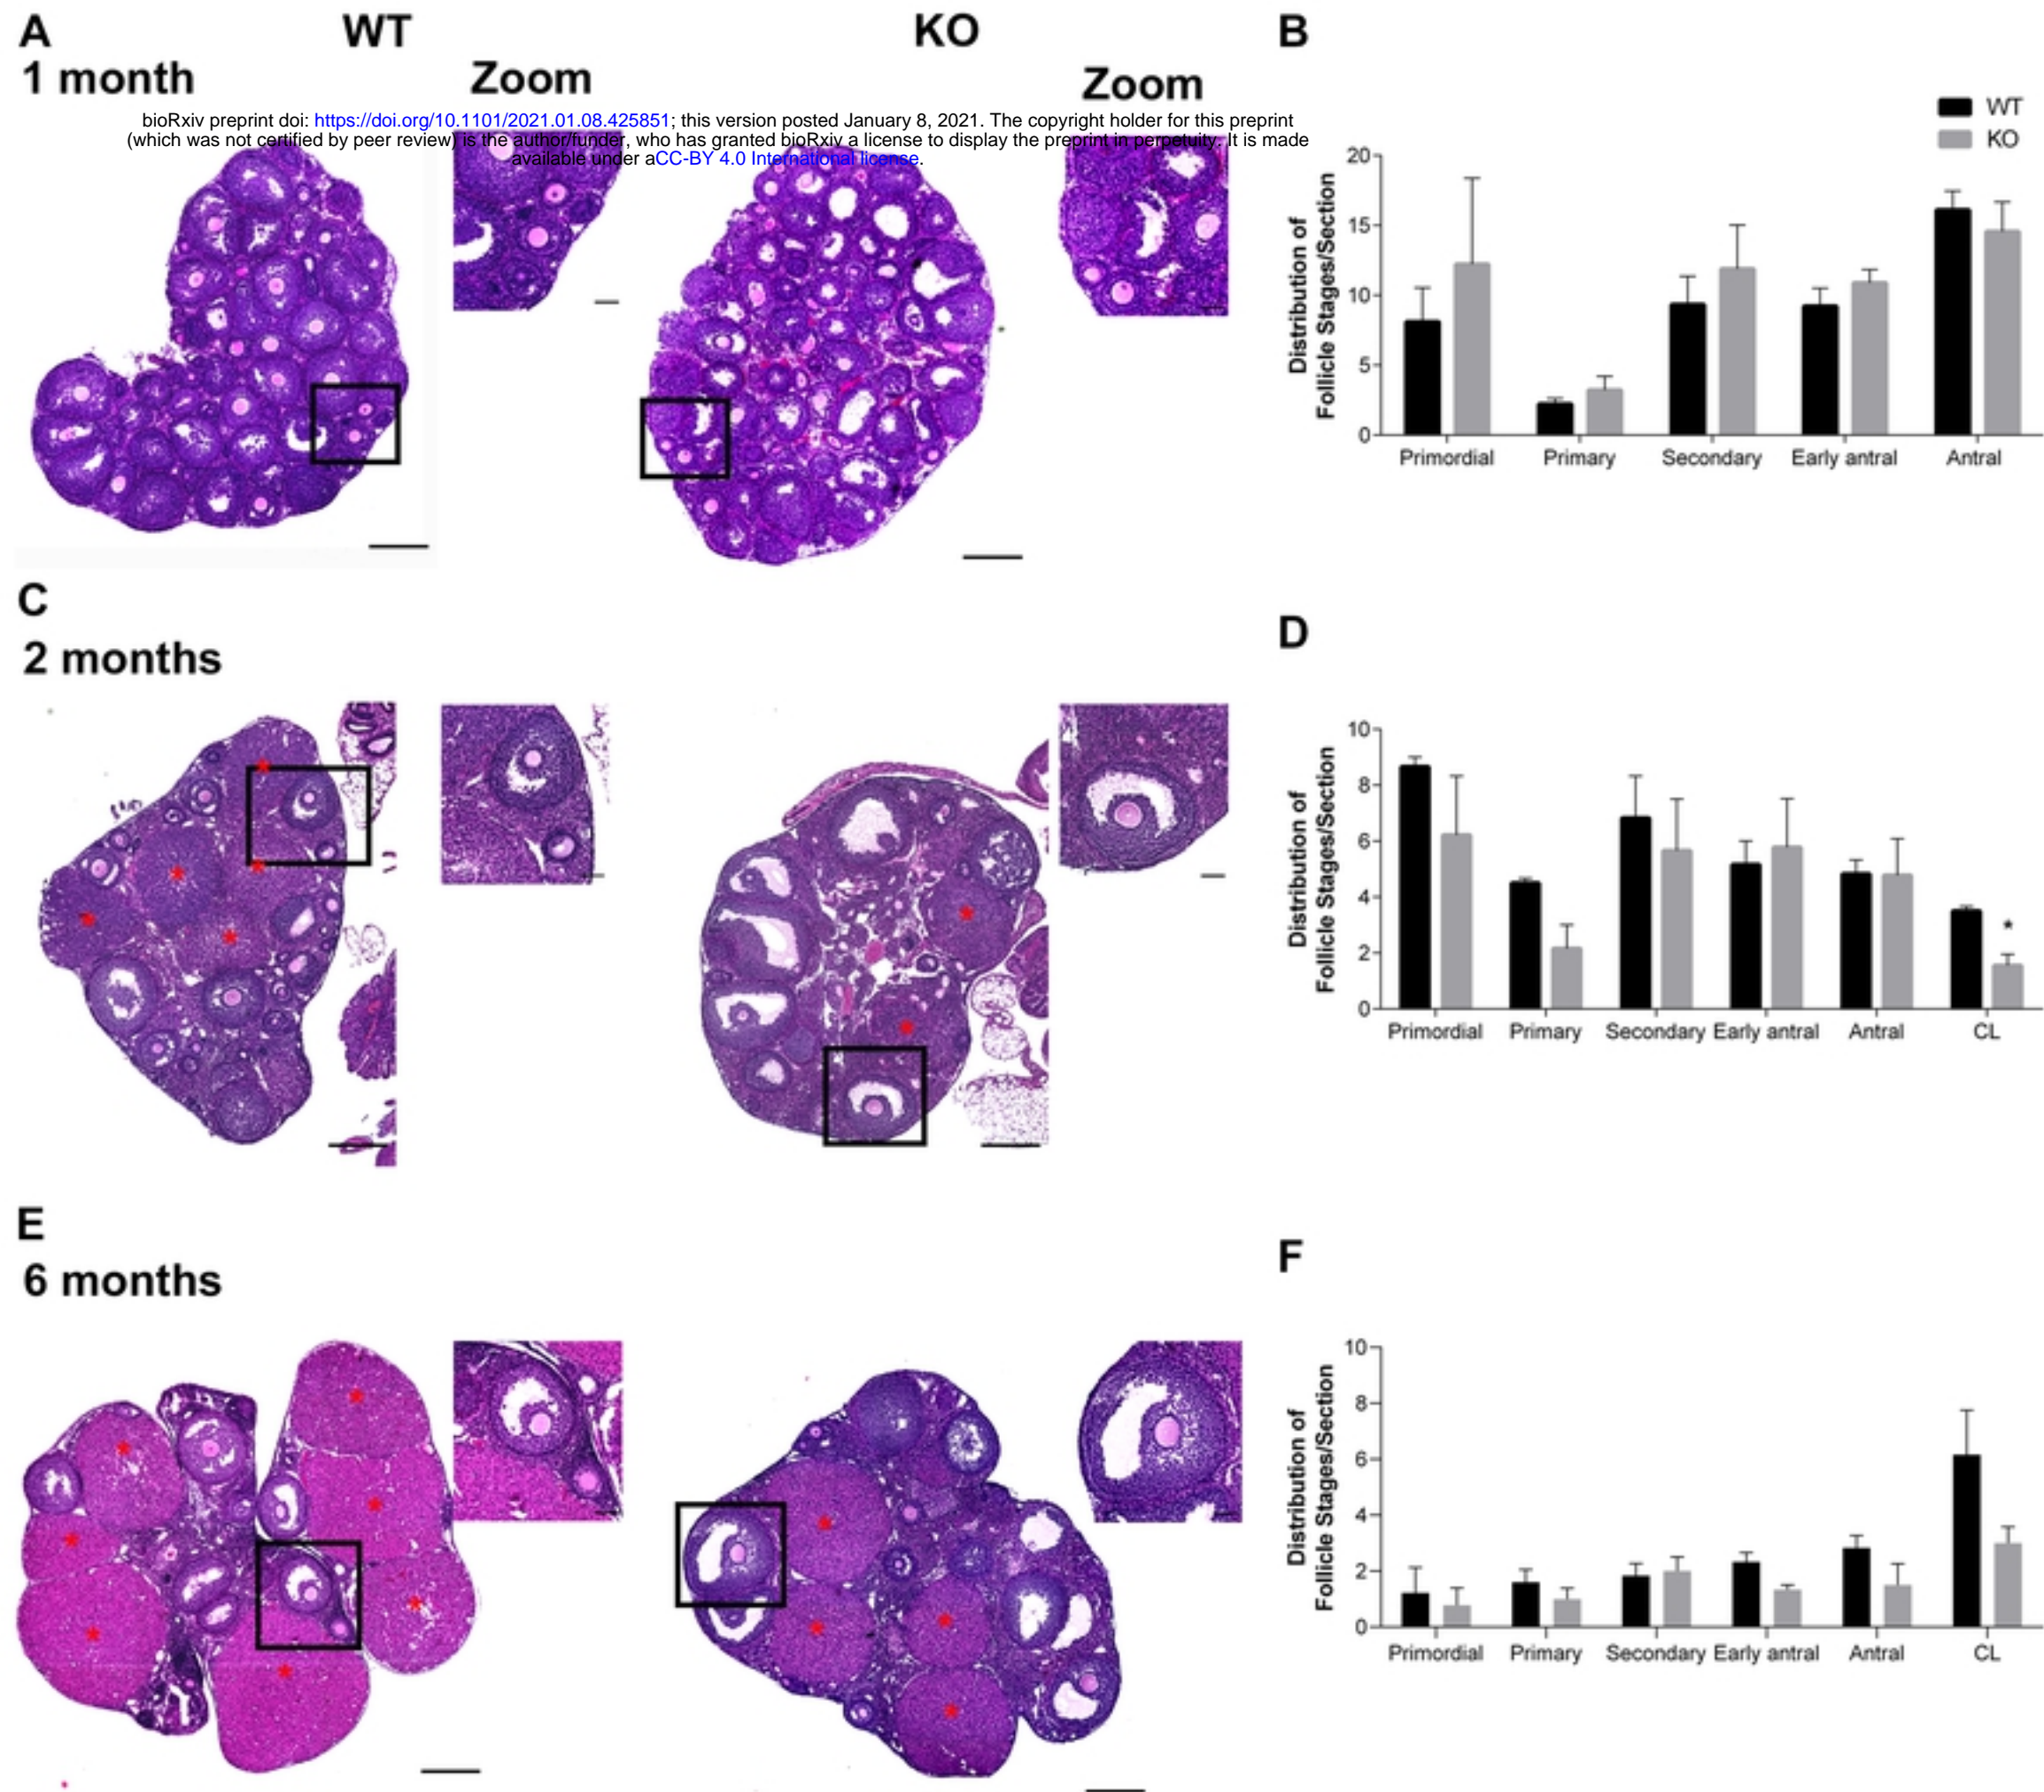

Figure 2



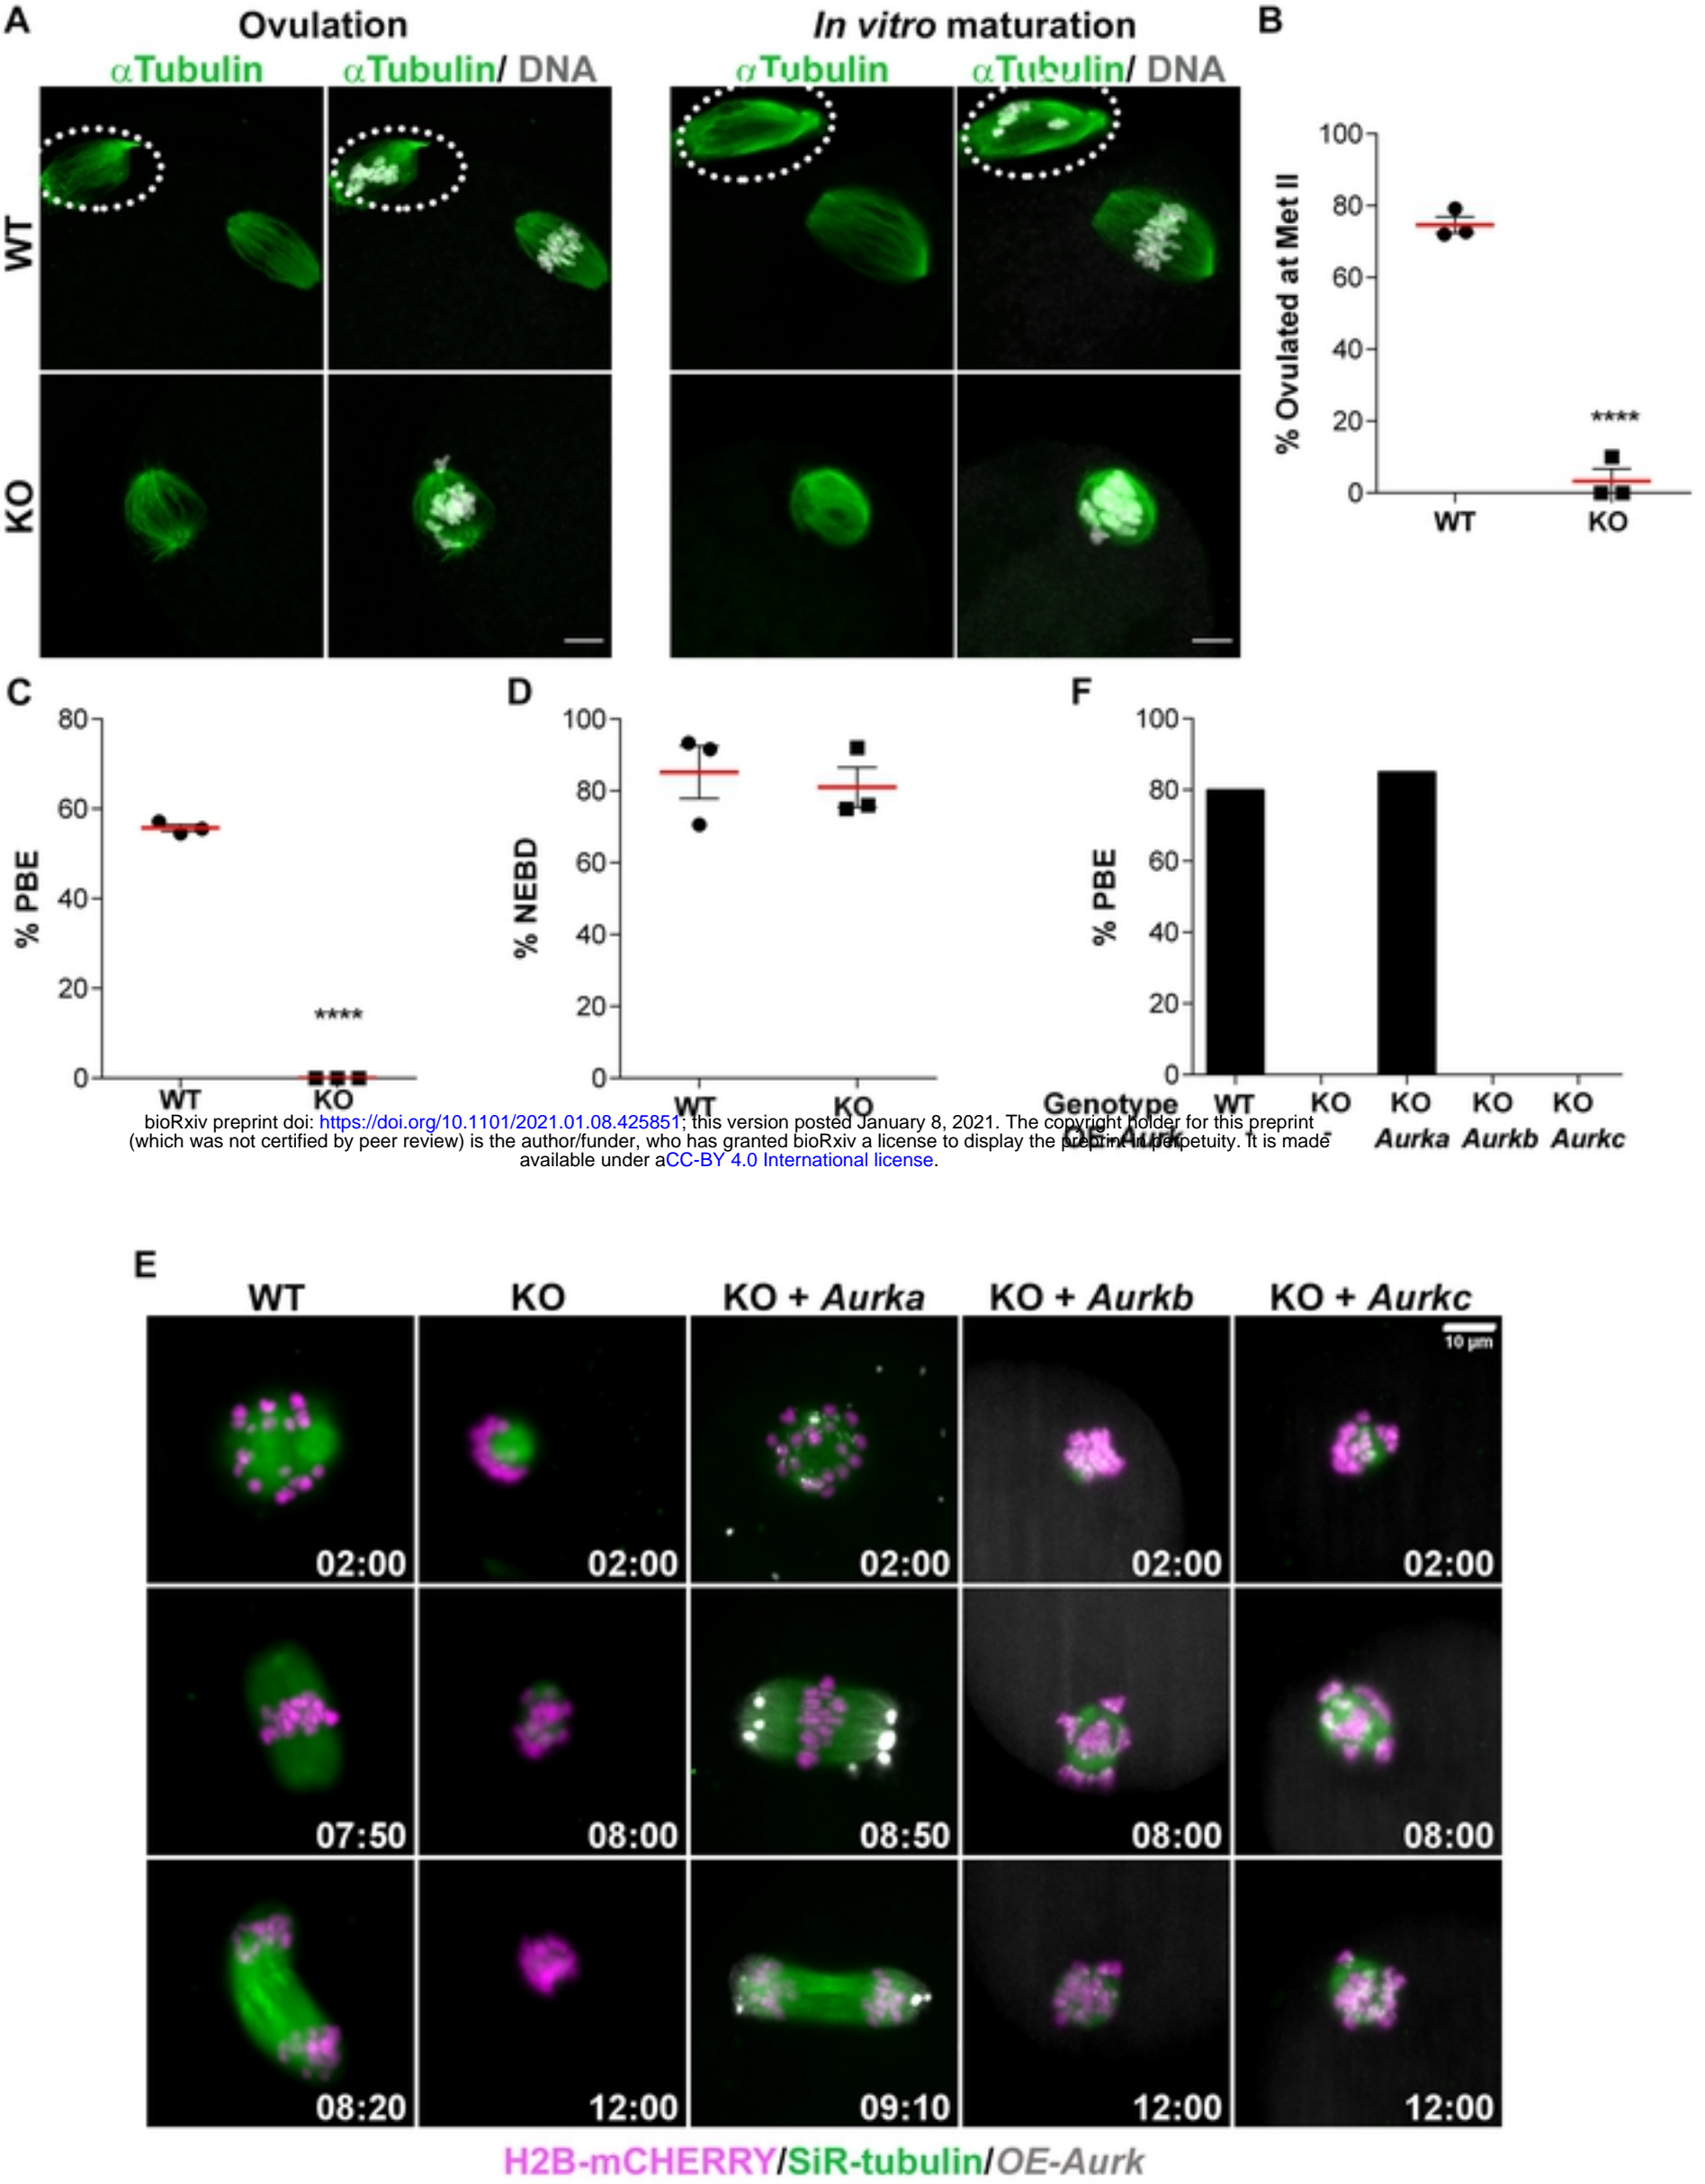

Figure 3

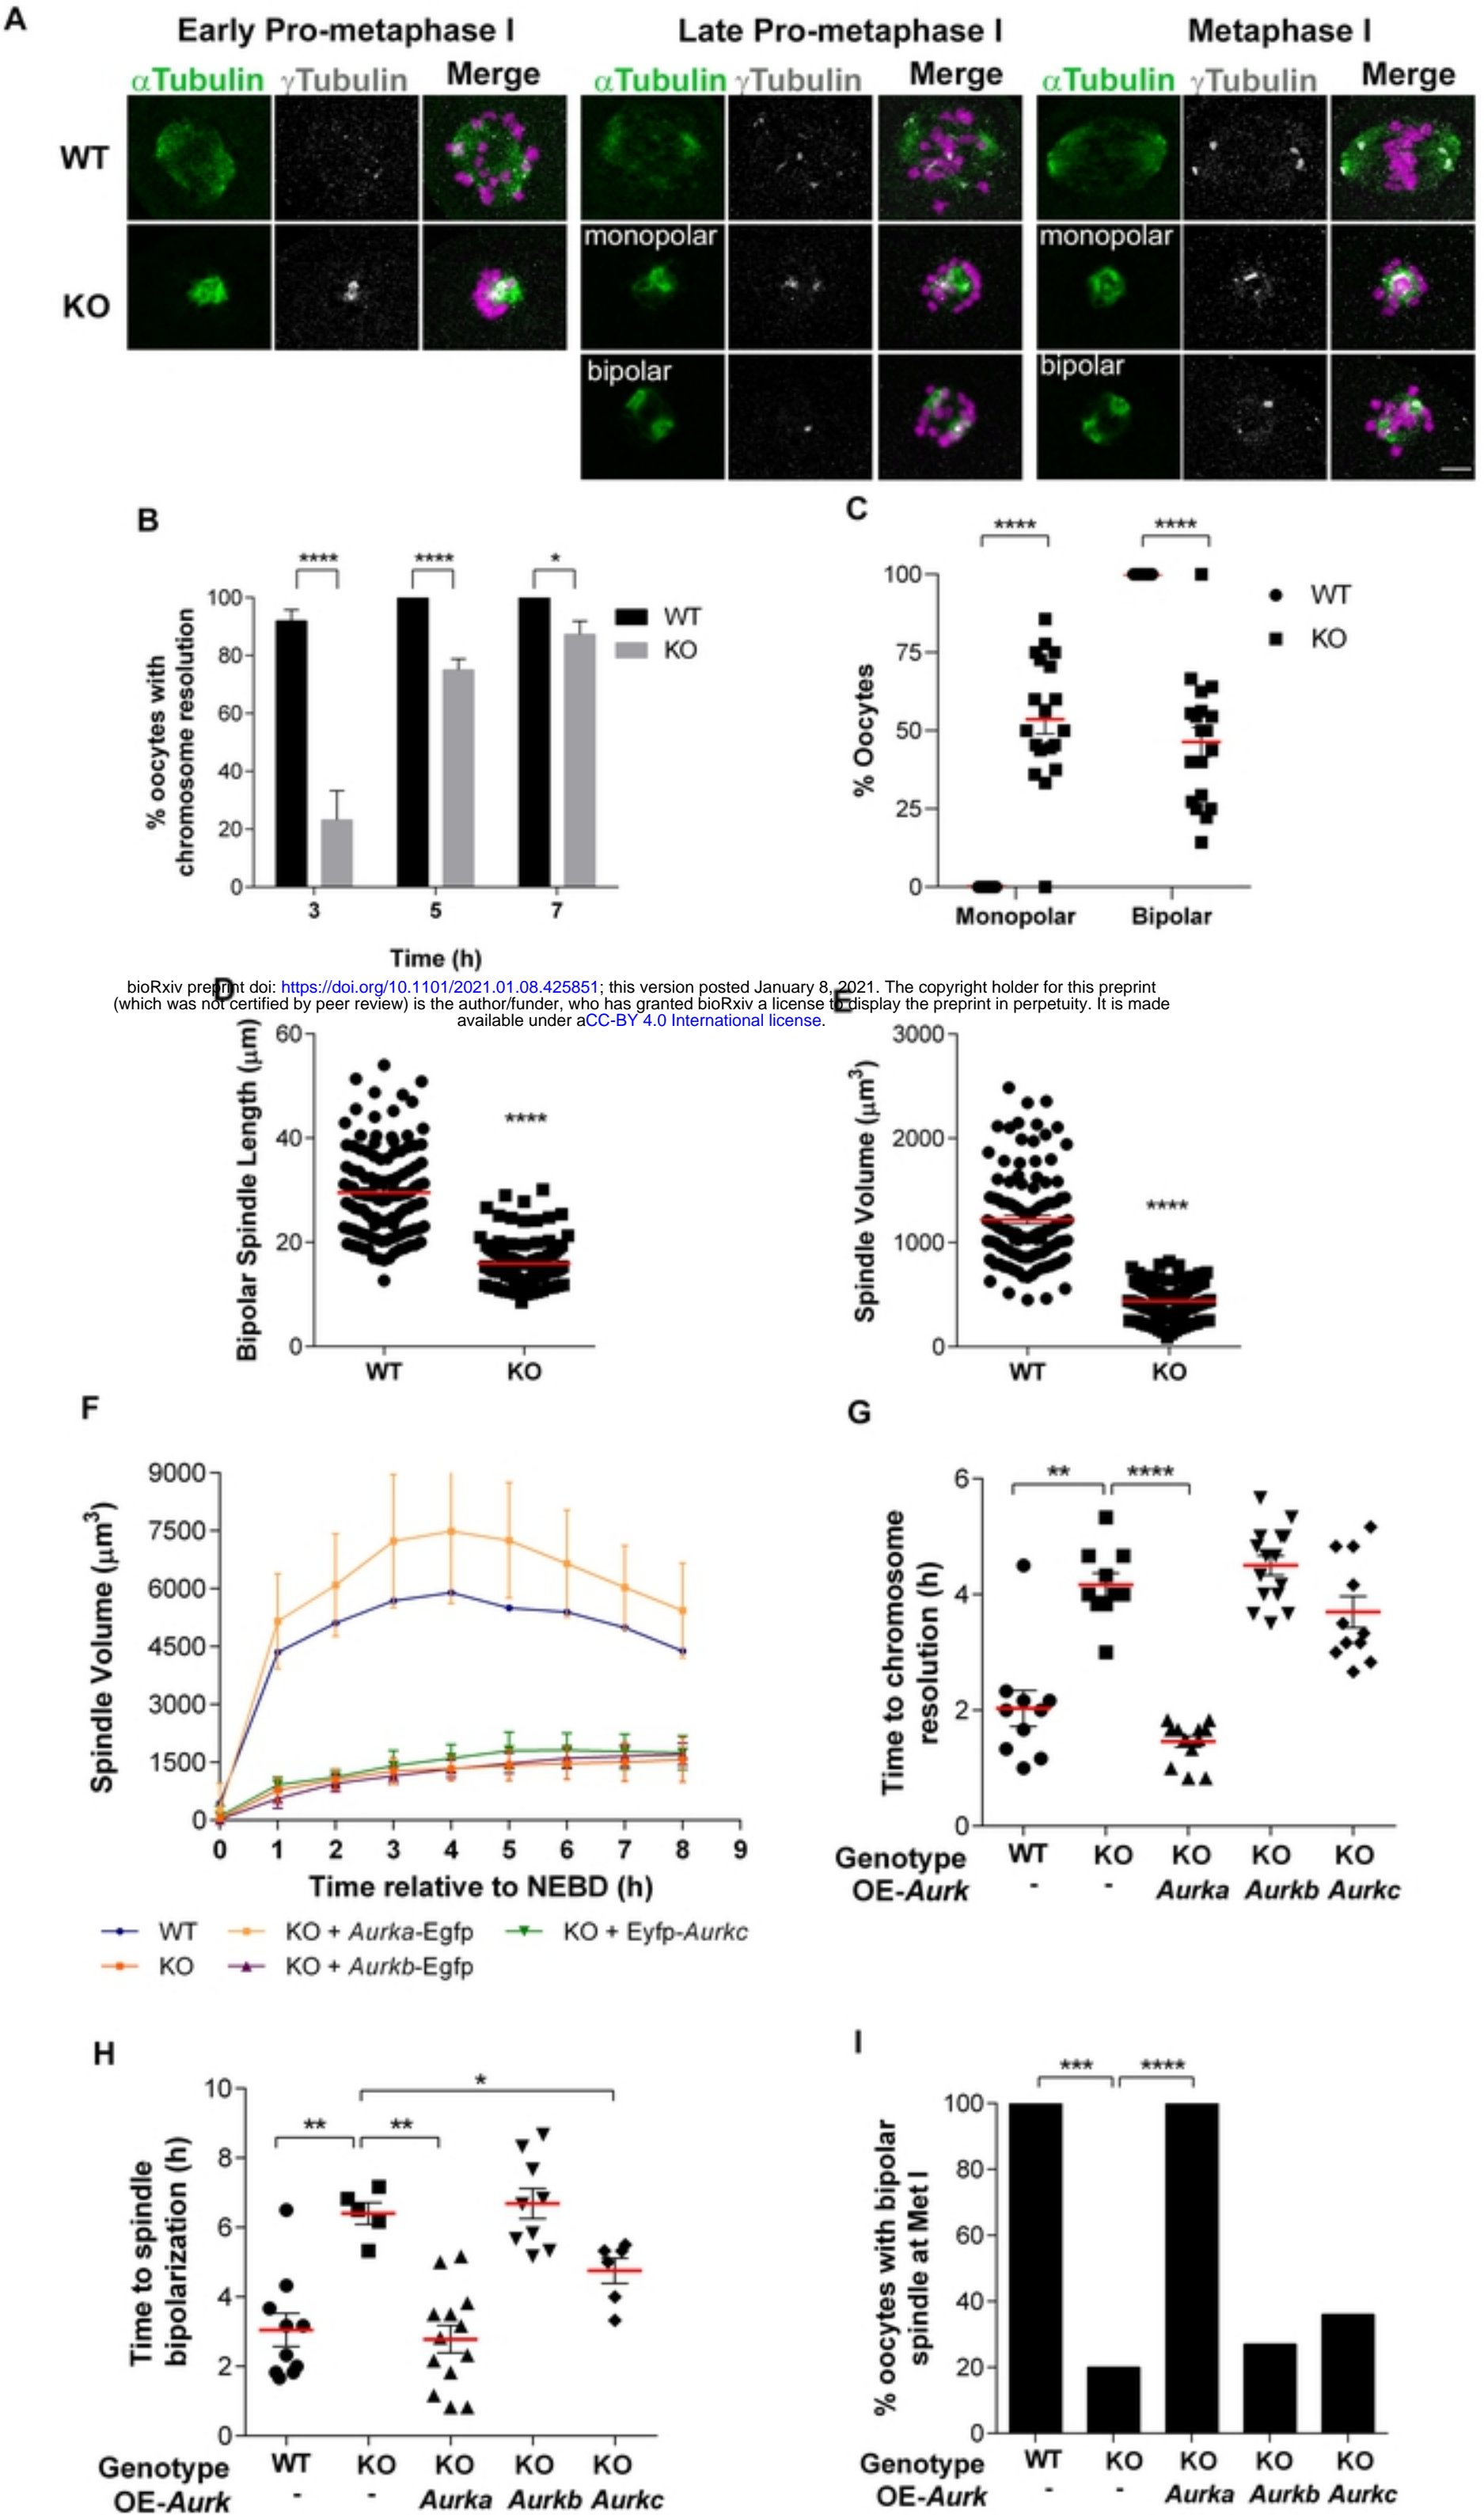

bioRxiv preprint doi: <https://doi.org/10.1101/2021.01.08.425851>; this version posted January 8, 2021. The copyright holder for this preprint (which was not certified by peer review) is the author/funder, who has granted bioRxiv a license to display the preprint in perpetuity. It is made available under aCC-BY 4.0 International license.

Figure 4

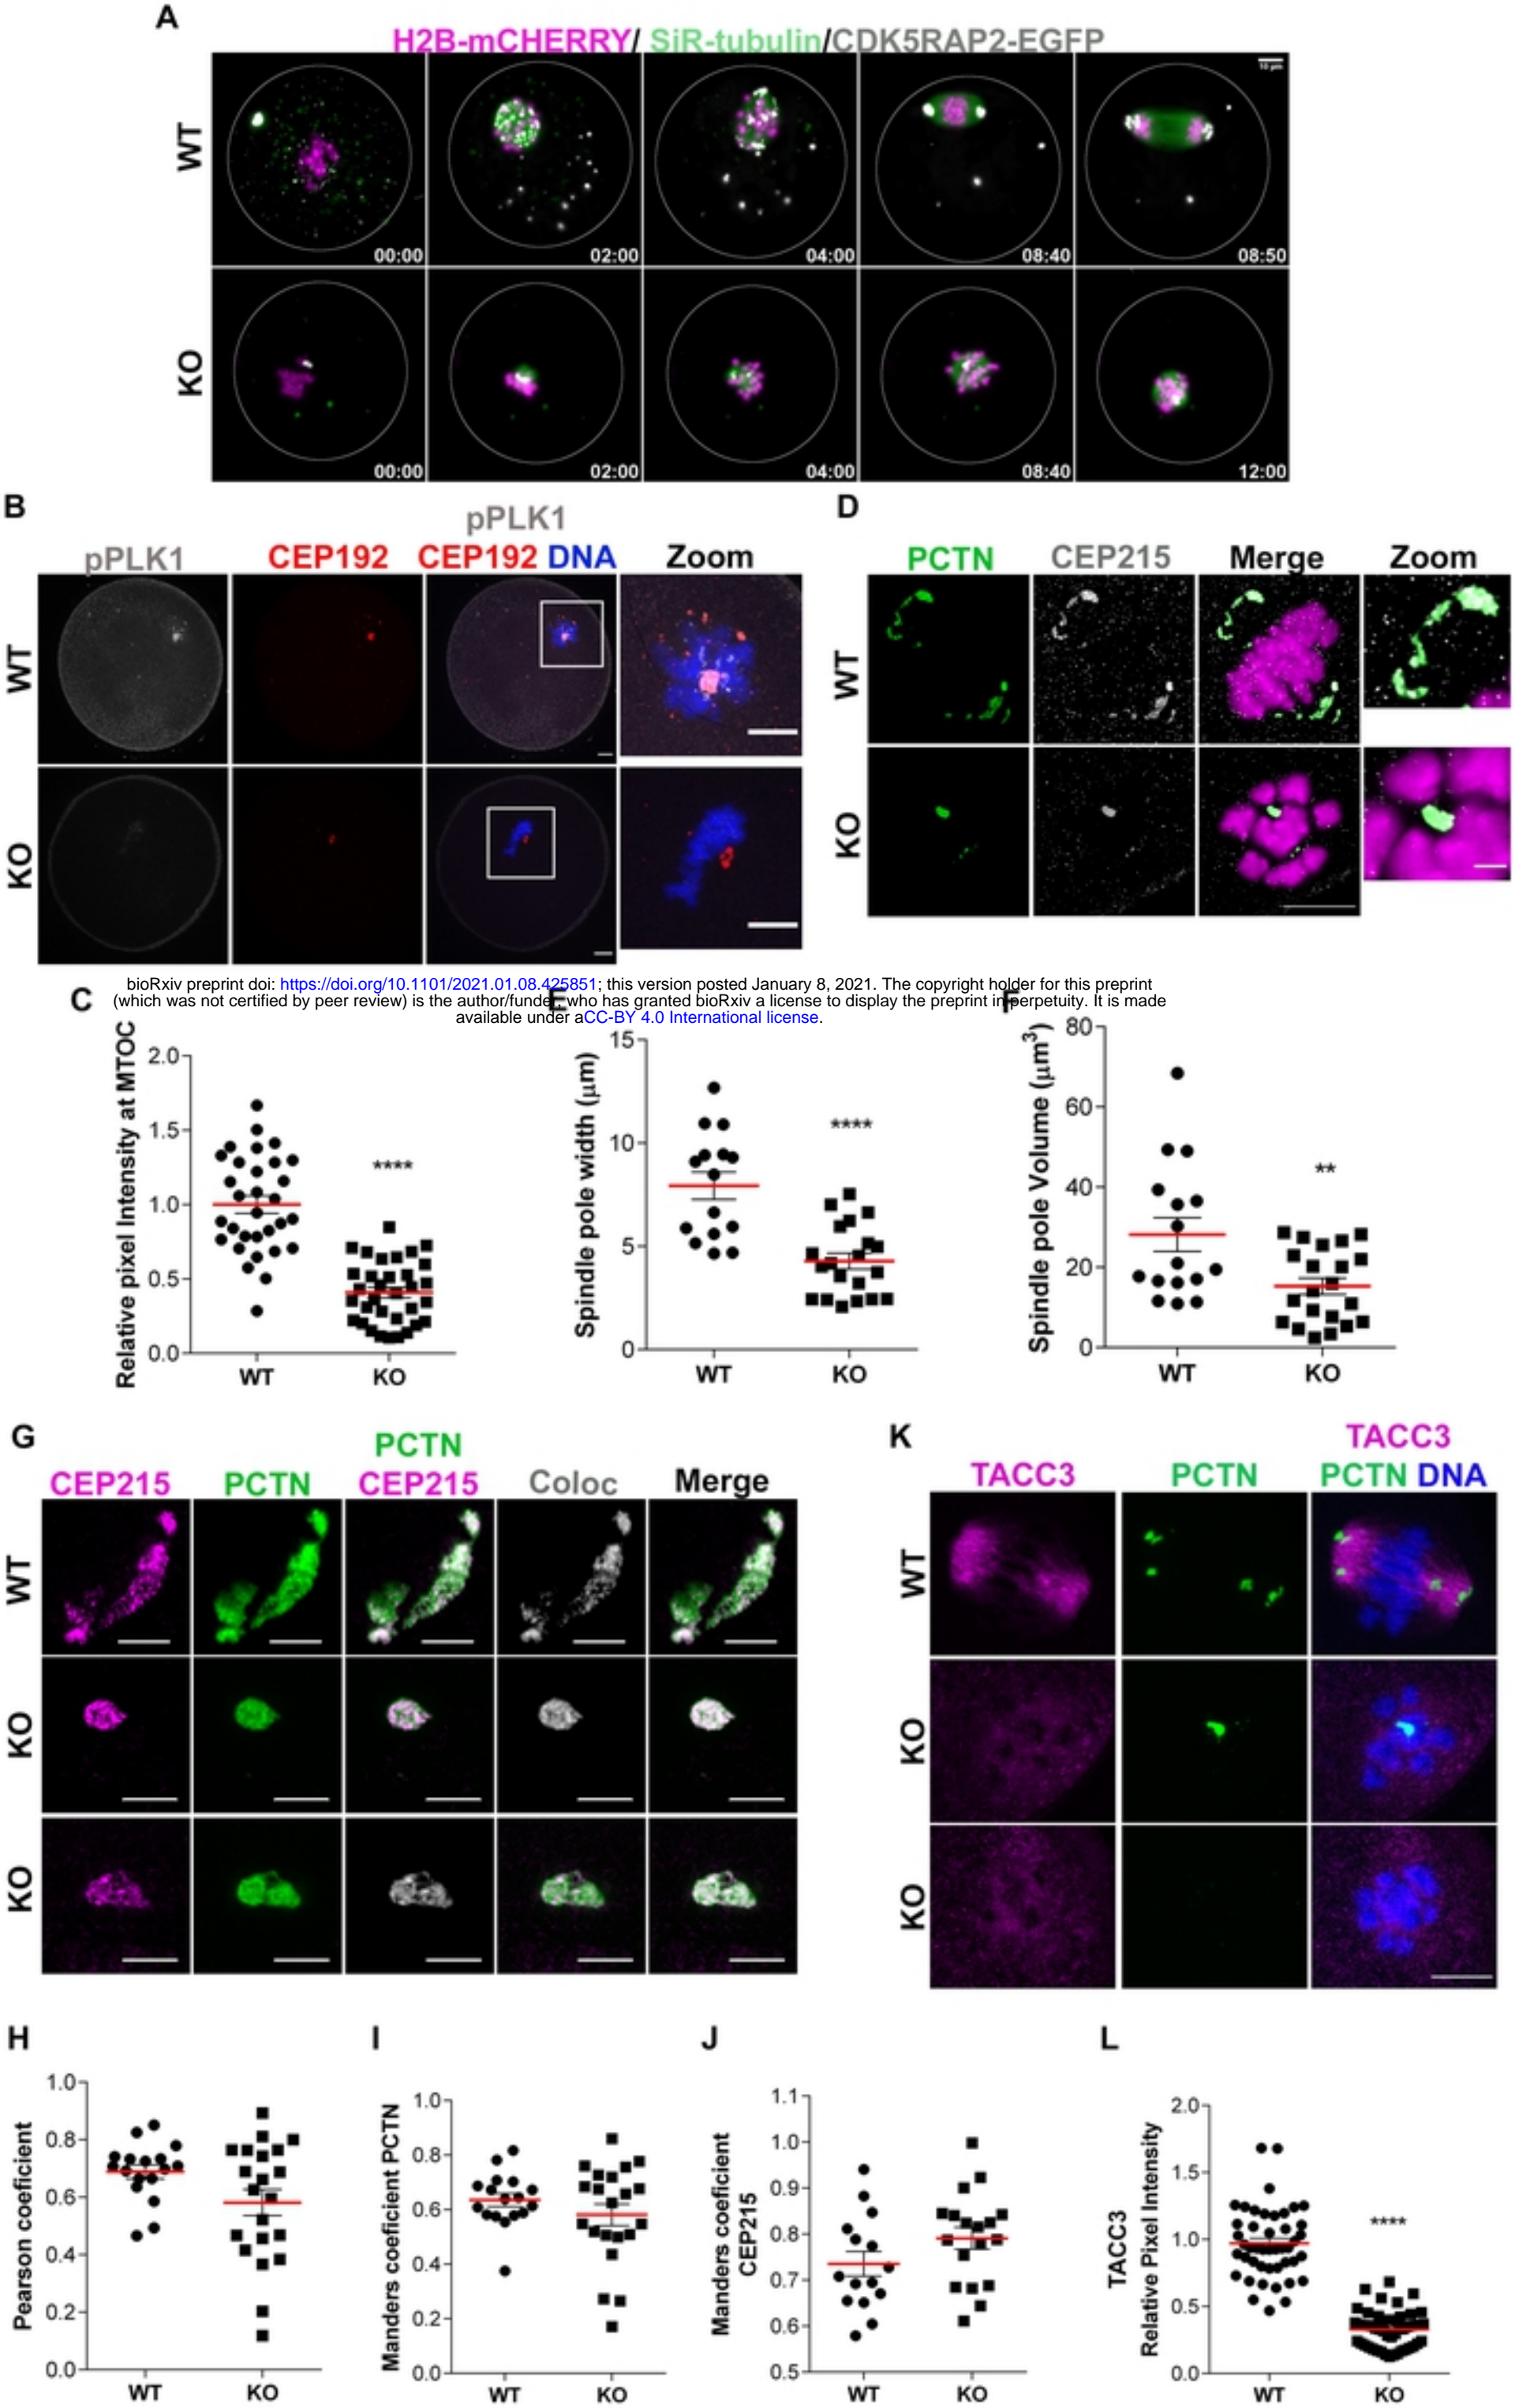

Figure 5

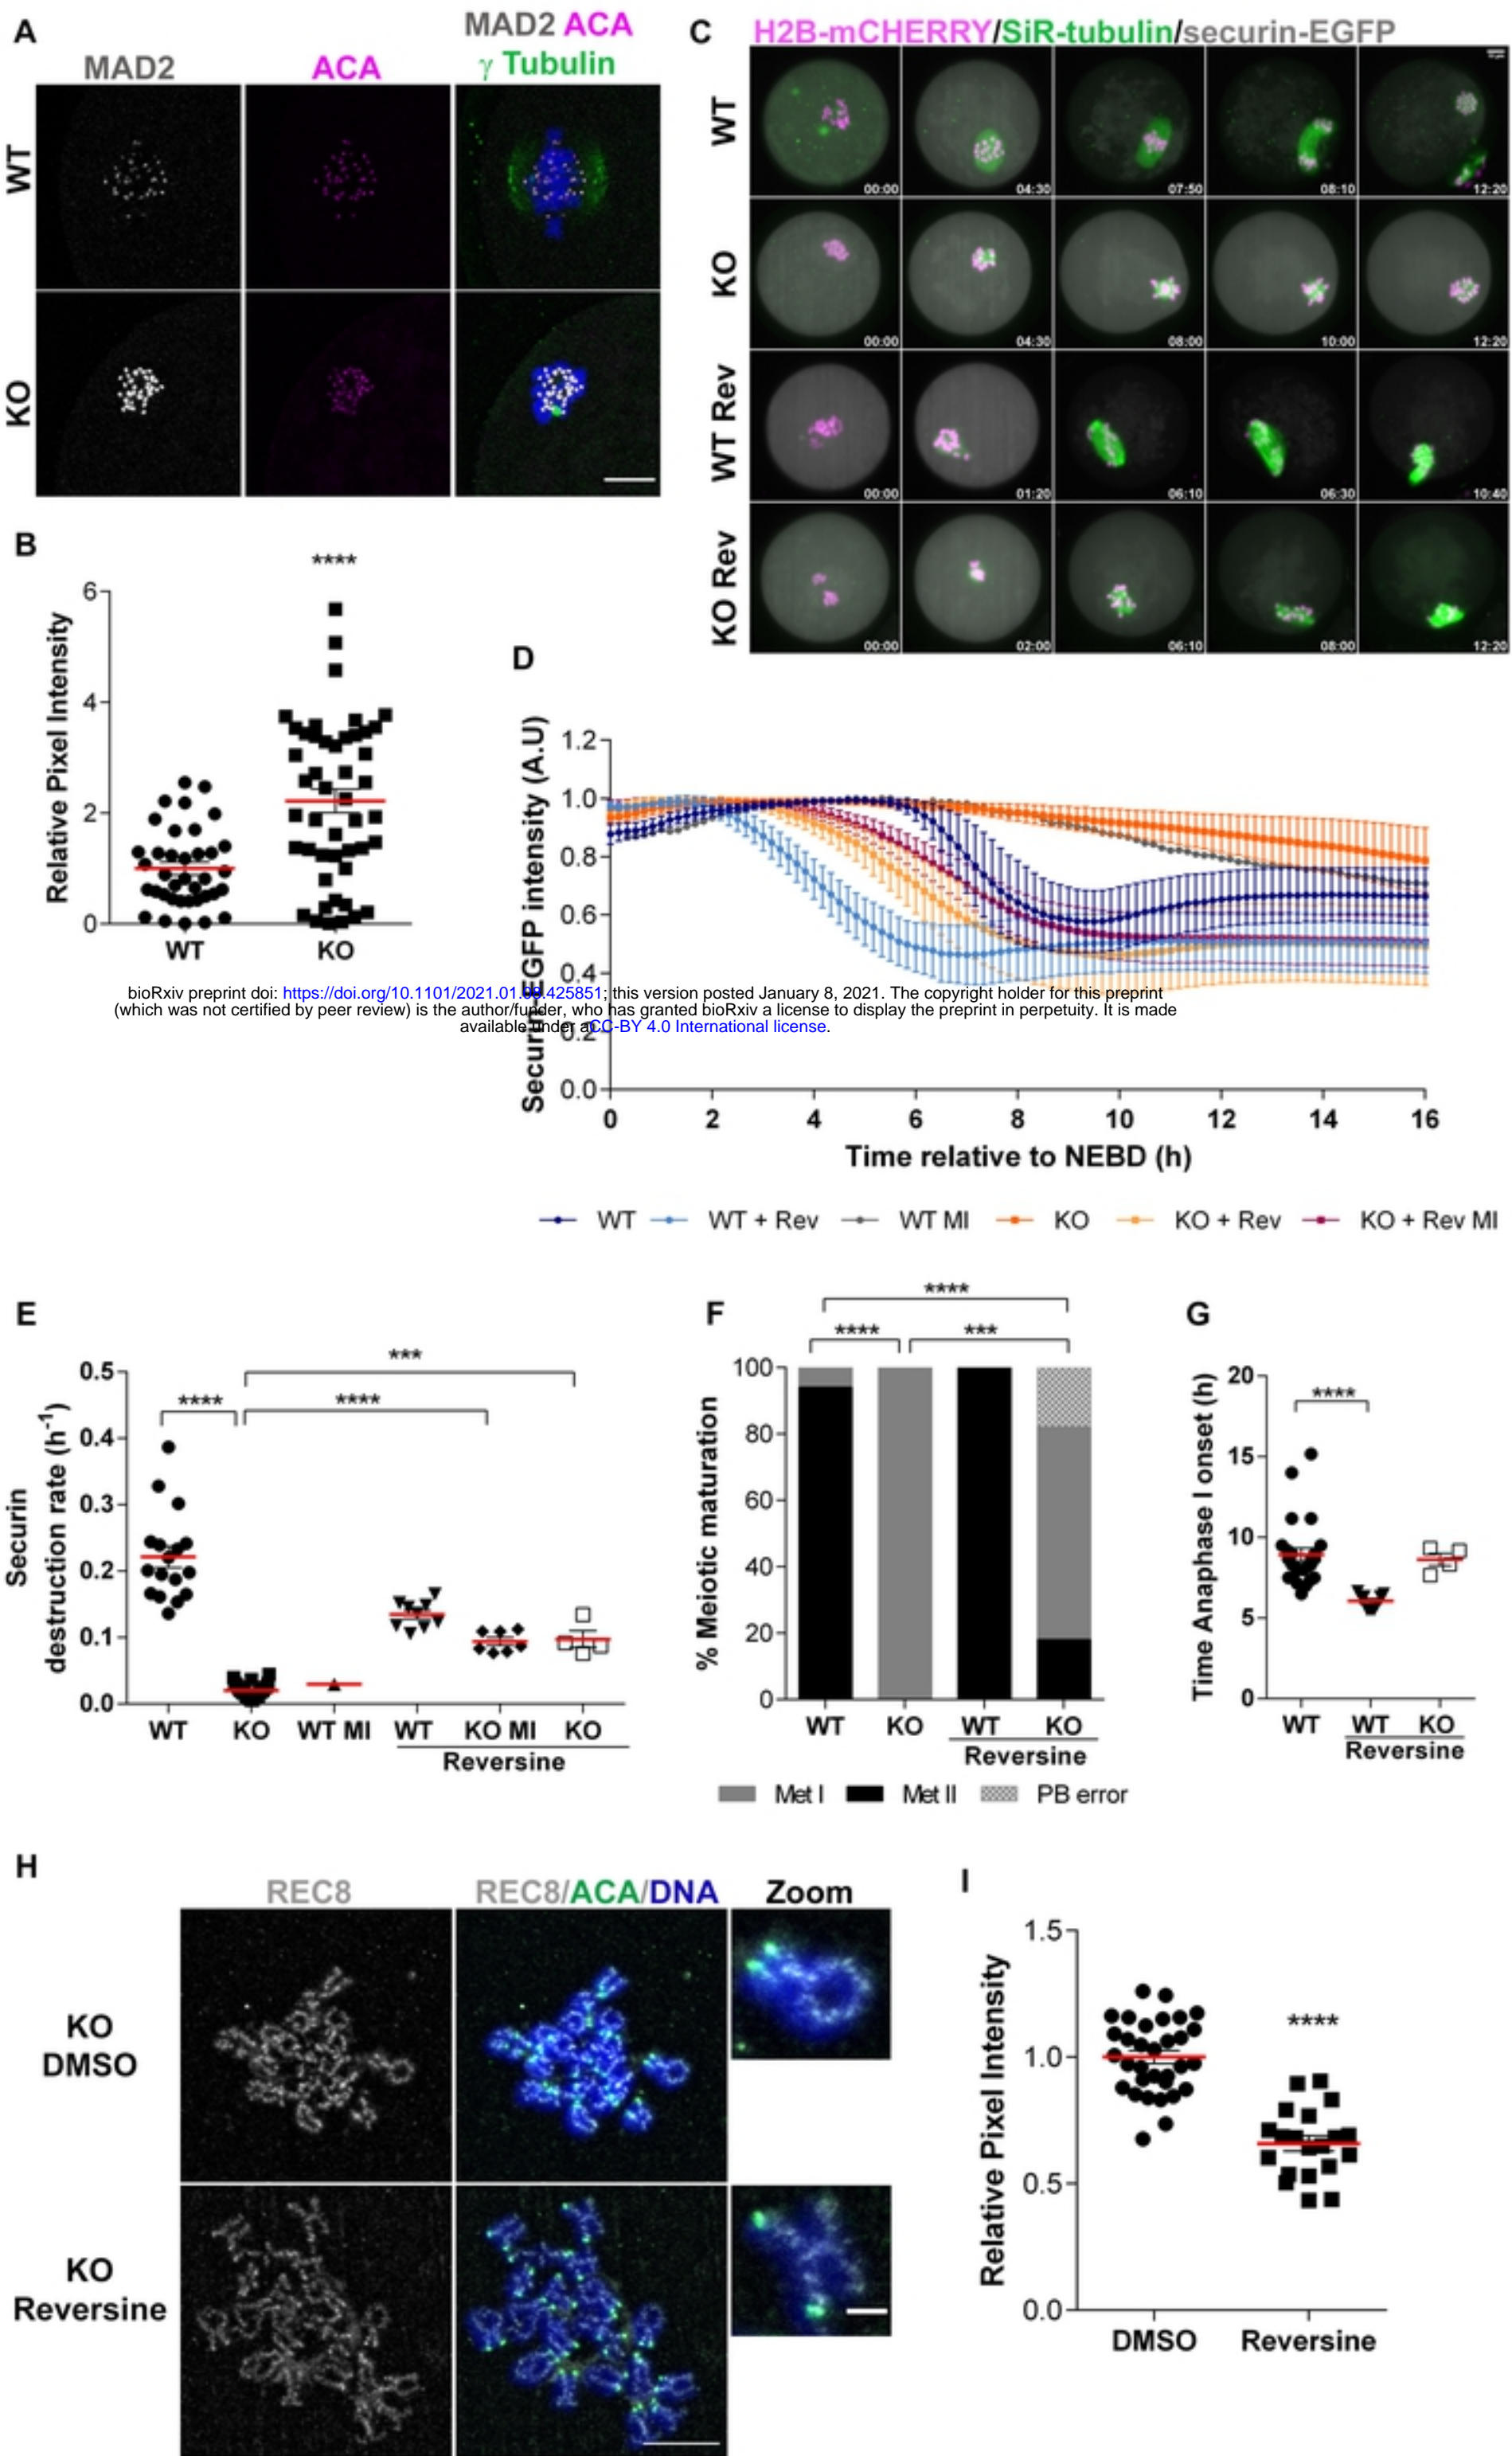

Figure 6

## Aurka KO oocytes

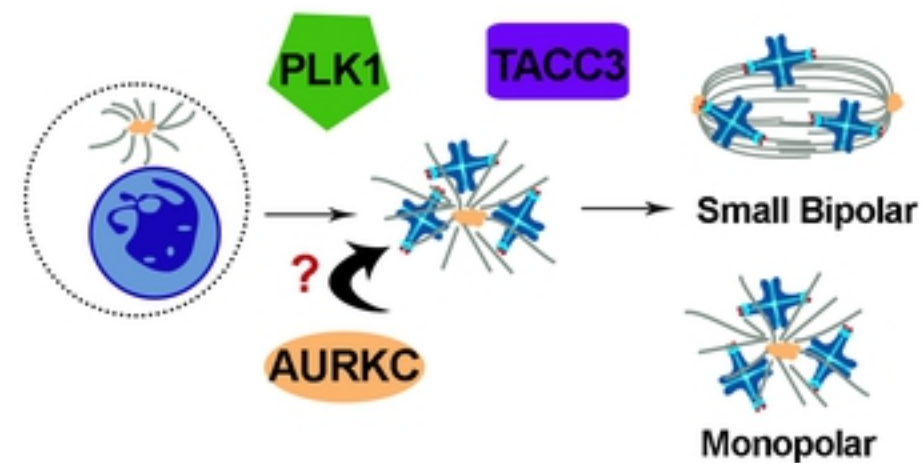

## WT oocytes

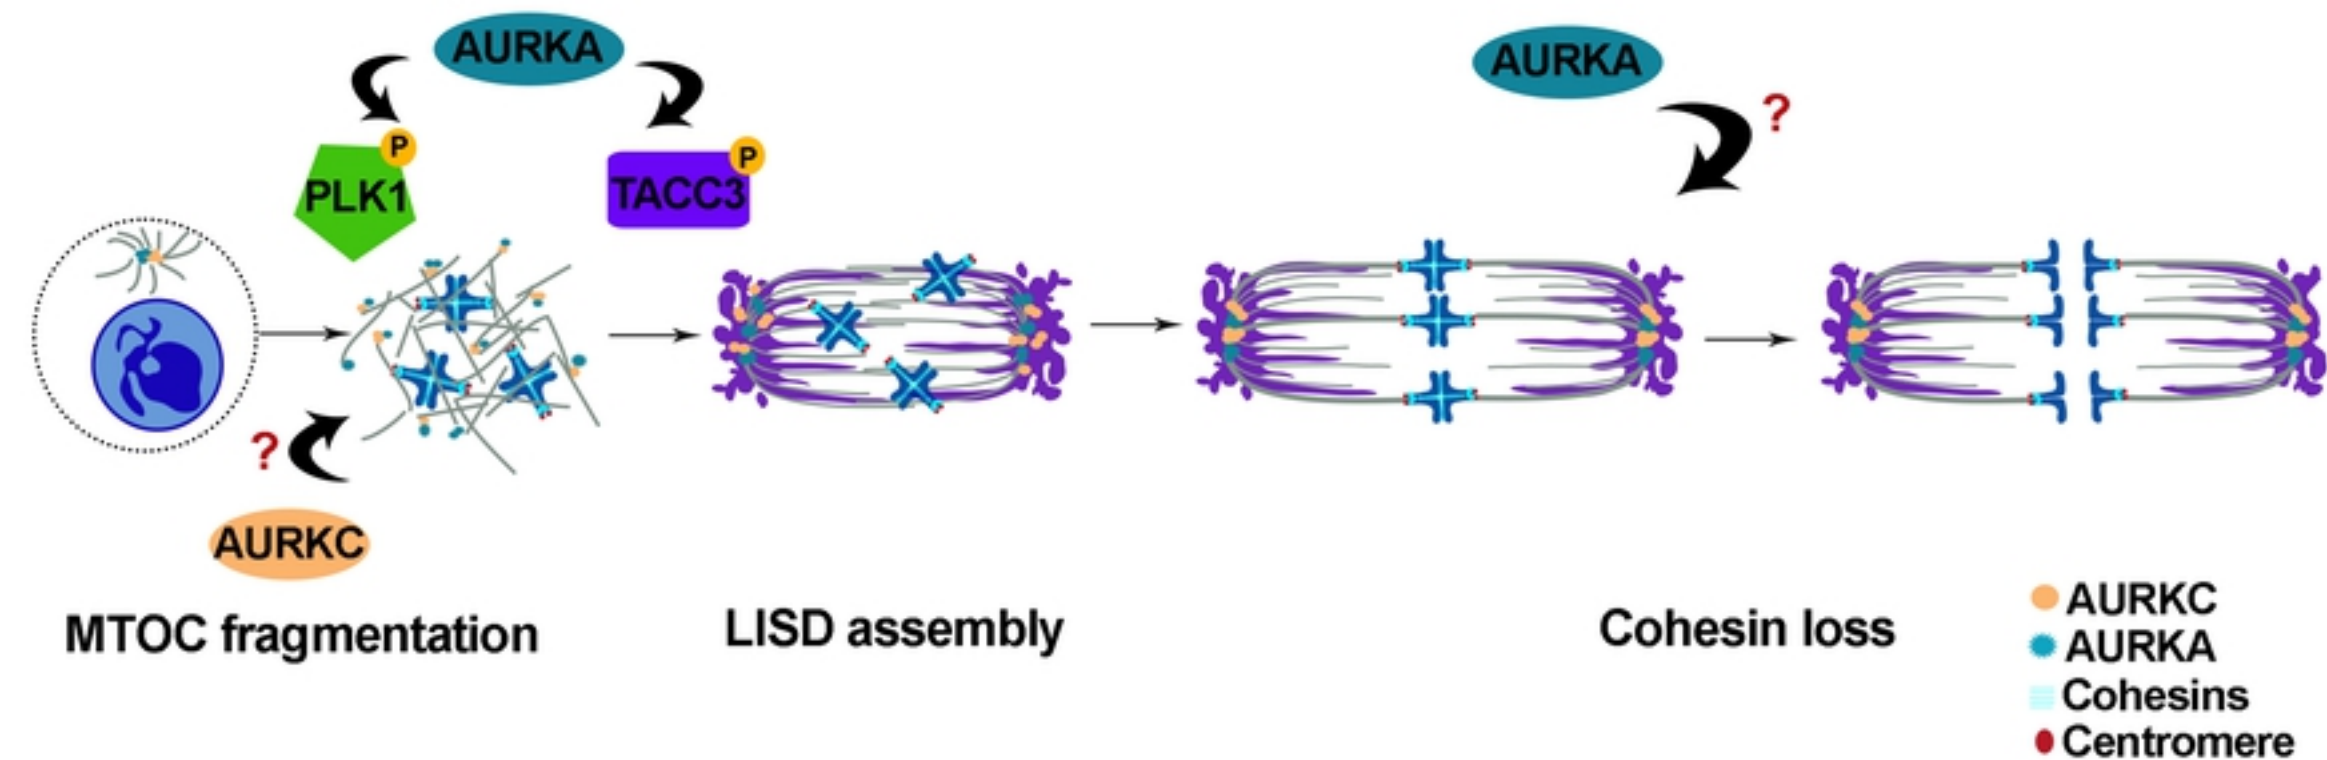

Figure 7
